# Supplementary material for: Innate immune receptor signaling induces transient melanoma dedifferentiation while preserving immunogenicity
Source: HighWire-hosted journal article supplement (doi:10.1136/jitc-2021-003863), 2022-06-01
Supplement: jitc-2021-003863supp002_data_supplement.xlsx [file jitc-2021-003863supp002_data_supplement.xlsx]

## Sheet: Supplementary table S1A
Supplementary table S1A. Gene expression correlated with DDX58 in Spearman correlations (p<0.05)
in the Tsoi cell lines cohort. Q_Bonf: conservative Bonferroni correction for the number of tests.
q_FDR: FDR-corrected p-values applying p.adjust() in R using the fdr method. The top 50 genes were
the queried for enrichment analysis in Enrichr (https://maayanlab.cloud/Enrichr/)
DEG Tsoi cohort ranked by significane
corr_gene	p	coeff	q_Bonf	q_FDR
APOL1	0	0.720145	0	0
DDX58	0	1	0	0
IRF1	0	0.7575	0	0
TMCC2	0	-0.728454	0	0
RARRES3	8.39601e-10	0.716486	1.65914e-05	3.31844e-06
KCTD11	1.29047e-09	0.715647	2.55011e-05	4.25039e-06
TNFRSF9	2.12104e-09	0.708068	4.19139e-05	5.988e-06
HRH1	3.88799e-09	0.699868	7.68305e-05	9.6043e-06
AKR1C3	4.68169e-09	0.697298	9.25149e-05	1.028e-05
APOL3	5.41705e-09	0.695261	0.000107046	1.07052e-05
HSPA12A	1.09194e-08	-0.702916	0.000215777	1.96171e-05
SP140L	2.16123e-08	0.694302	0.000427081	3.55919e-05
SAMD9	2.44955e-08	0.692472	0.000484055	3.72369e-05
AOX1	3.00213e-08	0.670034	0.000593251	4.23772e-05
IL32	3.29288e-08	0.668599	0.000650706	4.33826e-05
GBP3	3.69575e-08	0.685992	0.000730317	4.35587e-05
WDR91	3.74708e-08	-0.685763	0.00074046	4.35587e-05
EGFR	5.09511e-08	0.680503	0.00100684	5.41234e-05
C11orf96	5.20365e-08	-0.66138	0.00102829	5.41234e-05
PINX1	5.99468e-08	-0.677606	0.00118461	5.92334e-05
PLEKHN1	6.82639e-08	0.675243	0.00134896	6.2347e-05
CD163L1	6.94077e-08	0.656733	0.00137157	6.2347e-05
KRT80	7.71104e-08	0.655015	0.00152378	6.62546e-05
PRDM7	8.56018e-08	-0.653299	0.00169158	6.85295e-05
CRIM1	8.69415e-08	0.670745	0.00171805	6.85295e-05
TRAM2	9.01613e-08	0.670059	0.00178168	6.85295e-05
ROBO4	1.03192e-07	0.650202	0.00203917	7.55288e-05
LRGUK	1.20113e-07	-0.647659	0.00237356	8.47741e-05
ABCC3	1.30596e-07	0.646247	0.00258071	8.89946e-05
CASKIN1	1.38334e-07	-0.661826	0.00273361	9.11249e-05
ZNF704	1.43834e-07	-0.661063	0.00284231	9.12458e-05
ELK3	1.54858e-07	0.659615	0.00306014	9.12458e-05
ANXA10	1.55418e-07	0.643288	0.00307121	9.12458e-05
ISG15	1.57278e-07	0.65931	0.00310796	9.12458e-05
B3GALT5	1.61603e-07	0.64262	0.00319344	9.12458e-05
HPS4	1.79344e-07	-0.656718	0.00354402	9.84498e-05
TPM4	1.90717e-07	0.655498	0.00376876	0.000101864
KLF4	2.36193e-07	0.651229	0.00466741	0.000122833
DPYD	2.577e-07	0.634506	0.0050924	0.000126238
SP100	2.6971e-07	0.648561	0.00532974	0.000126238
KRT8	2.80097e-07	0.647799	0.005535	0.000126238
TRPM1	2.81007e-07	-0.632974	0.00555297	0.000126238
IL7R	2.83381e-07	0.632825	0.00559988	0.000126238
TBC1D7	2.84359e-07	-0.647494	0.00561922	0.000126238
LONRF1	2.91968e-07	-0.64696	0.00576957	0.000126238
MTURN	3.00903e-07	-0.64635	0.00594615	0.000126238
CHIC2	3.03178e-07	0.646198	0.0059911	0.000126238
DSTYK	3.06621e-07	-0.645969	0.00605914	0.000126238
LHFPL3	3.1856e-07	-0.63074	0.00629507	0.000128477
CARD11	3.47981e-07	0.629156	0.00687646	0.000137536
NR3C1	3.71258e-07	0.642081	0.00733643	0.000143859
TNIP3	4.02678e-07	0.626519	0.00795732	0.000153033
LAMC2	4.10702e-07	0.62616	0.00811588	0.000153138
TNIP1	4.74645e-07	0.63705	0.00937947	0.000173703
ADAM11	5.13014e-07	-0.635449	0.0101377	0.000181646
KRT7	5.14733e-07	0.622027	0.0101716	0.000181646
PMEL	5.46252e-07	-0.634153	0.0107945	0.000189387
ANXA8L1	5.60323e-07	0.620458	0.0110725	0.000190916
MXI1	6.32864e-07	-0.631103	0.012506	0.000210024
NRAP	6.50184e-07	-0.617687	0.0128483	0.000210024
DNMBP	6.56506e-07	0.630341	0.0129732	0.000210024
ST3GAL6	6.58916e-07	-0.630265	0.0130208	0.000210024
PPP1R18	6.71097e-07	0.629884	0.0132615	0.000210511
SEPT4	6.96254e-07	-0.616402	0.0137587	0.00021499
KLF15	7.46144e-07	-0.627673	0.0147446	0.000221606
ZC3H13	7.48871e-07	-0.627597	0.0147984	0.000221606
RAB3A	7.54354e-07	-0.627444	0.0149068	0.000221606
GBP1	7.68231e-07	0.627063	0.015181	0.000221606
SYNPO	7.82353e-07	0.626682	0.0154601	0.000221606
GLP2R	7.84964e-07	0.614138	0.0155117	0.000221606
HMGA1	8.05471e-07	0.626072	0.0159169	0.000224193
MOB3A	8.59915e-07	0.6247	0.0169928	0.000229894
SLC19A2	8.63041e-07	-0.624624	0.0170546	0.000229894
GPM6B	8.69327e-07	-0.624471	0.0171788	0.000229894
IL17D	8.72486e-07	-0.624395	0.0172412	0.000229894
GPR39	9.29477e-07	0.610917	0.0183674	0.000239878
PTPRK	9.34653e-07	0.622946	0.0184697	0.000239878
TWIST2	9.64434e-07	0.610209	0.0190582	0.000244348
PLEC	9.7962e-07	0.621955	0.0193583	0.000245054
RRAS	1.00832e-06	0.621346	0.0199254	0.000247785
TFE3	1.01562e-06	0.621193	0.0200696	0.000247785
MVP	1.05668e-06	0.620354	0.0208811	0.000253334
ASB4	1.064e-06	-0.608315	0.0210257	0.000253334
SMURF2	1.08364e-06	0.619821	0.0214138	0.000254916
CD7	1.10673e-06	0.607553	0.0218701	0.000254916
PADI3	1.10934e-06	0.607507	0.0219217	0.000254916
CERS1	1.14776e-06	-0.618601	0.0226808	0.000258676
UBQLN2	1.15188e-06	0.618525	0.0227623	0.000258676
CARD14	1.21551e-06	-0.617381	0.0240196	0.000269897
ACP5	1.27792e-06	-0.616314	0.0252529	0.000280602
TSPAN2	1.31141e-06	0.604244	0.0259147	0.000284791
ZC3H12A	1.39212e-06	0.614484	0.0275096	0.000295054
SIRPA	1.39212e-06	-0.614484	0.0275096	0.000295054
LGI3	1.43182e-06	-0.602517	0.0282942	0.000295054
KLHL4	1.44708e-06	0.602308	0.0285957	0.000295054
NR4A1	1.45282e-06	-0.61357	0.0287091	0.000295054
ANTXR2	1.45335e-06	0.602222	0.0287196	0.000295054
MESDC2	1.46318e-06	-0.613417	0.0289139	0.000295054
PRKCA	1.47885e-06	0.613188	0.0292236	0.000295203
SLC26A9	1.52028e-06	0.601332	0.0300423	0.000295629
ULK3	1.52143e-06	-0.612579	0.0300651	0.000295629
CA14	1.54864e-06	-0.612197	0.0306027	0.000295629
TRIM63	1.57037e-06	-0.600689	0.0310321	0.000295629
BASP1	1.57061e-06	0.600686	0.0310368	0.000295629
DLL3	1.57074e-06	-0.611893	0.0310394	0.000295629
WIPF3	1.63967e-06	-0.599831	0.0324015	0.00030569
LURAP1L	1.7241e-06	0.59883	0.03407	0.000318427
NR4A3	1.76493e-06	-0.609377	0.0348767	0.000322949
CLCF1	1.81856e-06	0.597762	0.0359366	0.000328438
SCAPER	1.82816e-06	-0.608614	0.0361263	0.000328438
ITGA2	1.87371e-06	0.608081	0.0370263	0.000333587
DCT	1.93385e-06	-0.607395	0.0382149	0.000340236
PRRT4	1.94549e-06	-0.596407	0.0384448	0.000340236
NMRK2	2.00038e-06	-0.595846	0.0395295	0.000346768
AXL	2.15543e-06	0.605031	0.0425935	0.000367204
MITF	2.15543e-06	-0.605031	0.0425935	0.000367204
CAV1	2.21642e-06	0.604422	0.0437987	0.000371194
TNKS1BP1	2.21642e-06	0.604422	0.0437987	0.000371194
TUBB4A	2.31905e-06	-0.603431	0.0458267	0.000385118
MSI2	2.37617e-06	-0.602897	0.0469554	0.000391315
NBL1	2.42619e-06	-0.602439	0.0479439	0.00039625
RAB11FIP4	2.60025e-06	-0.600915	0.0513835	0.00041584
APOE	2.60926e-06	-0.600839	0.0515615	0.00041584
CHD7	2.60926e-06	-0.600839	0.0515615	0.00041584
SGMS1	2.66393e-06	0.600381	0.0526419	0.000421156
GNA12	2.74798e-06	0.599695	0.0543028	0.000430996
B4GALT1	2.81508e-06	0.599161	0.0556288	0.000436122
SH3RF1	2.82479e-06	0.599085	0.0558208	0.000436122
TNFRSF12A	2.85412e-06	0.598856	0.0564003	0.000437234
TMEM40	2.92352e-06	0.58809	0.0577717	0.000442248
C10orf90	2.93375e-06	-0.598247	0.0579739	0.000442248
PDLIM7	2.95399e-06	0.598094	0.0583737	0.000442248
RRP7A	2.99485e-06	-0.597789	0.0591813	0.000444995
IL16	3.03626e-06	-0.597484	0.0599994	0.00044778
FAM180B	3.06846e-06	-0.587087	0.0606358	0.000449177
SMAGP	3.12069e-06	0.596874	0.061668	0.000453329
POU3F1	3.17925e-06	-0.586349	0.0628252	0.000453329
HAGHL	3.18548e-06	-0.596417	0.0629482	0.000453329
FOXF1	3.18858e-06	0.586288	0.0630095	0.000453329
PARP14	3.21834e-06	0.596188	0.0635977	0.000454292
TNFAIP2	3.26509e-06	0.585794	0.0645215	0.000457623
SLC2A1	3.29629e-06	0.595655	0.065138	0.000458742
LPIN2	3.37602e-06	0.595121	0.0667136	0.000461689
IL7	3.37966e-06	0.585073	0.0667855	0.000461689
MESDC1	3.38756e-06	-0.595045	0.0669416	0.000461689
SPRED3	3.50502e-06	0.594282	0.0692626	0.000474418
GGA1	3.52896e-06	-0.59413	0.0697359	0.000474418
SEC11C	3.61401e-06	-0.593596	0.0714165	0.000482568
XDH	3.65923e-06	0.583406	0.0723101	0.000485328
PHACTR1	3.77713e-06	-0.592605	0.0746398	0.000496008
DCBLD1	3.78996e-06	0.592529	0.0748934	0.000496008
EDN1	3.871e-06	0.58222	0.0764947	0.00050328
PLEKHH1	3.90731e-06	-0.591843	0.0772124	0.000504682
CALB2	4.03031e-06	0.581368	0.0796429	0.000517188
IL12RB1	4.06067e-06	0.581209	0.0802429	0.000517723
FAM167A	4.09526e-06	0.581029	0.0809264	0.000518785
TMEM200A	4.12214e-06	0.58089	0.0814576	0.000518864
ERRFI1	4.2088e-06	0.590166	0.0831702	0.00052642
UBE2E3	4.30925e-06	0.589632	0.0851552	0.000533795
SLC22A4	4.32179e-06	0.579885	0.0854028	0.000533795
ROS1	4.46539e-06	0.579189	0.0882407	0.000548106
CRTAC1	4.64268e-06	-0.578357	0.0917441	0.00056635
C15orf52	4.73414e-06	0.587498	0.0935514	0.000573964
IMMP2L	5.02783e-06	-0.586125	0.099355	0.000605854
QDPR	5.12949e-06	-0.585668	0.101364	0.000612696
TRANK1	5.14662e-06	0.585592	0.101702	0.000612696
NAT8L	5.18104e-06	-0.585439	0.102383	0.0006131
CLMP	5.23308e-06	0.585211	0.103411	0.000615172
CHL1	5.2608e-06	-0.575672	0.103959	0.000615172
GJB1	5.41012e-06	-0.584448	0.106909	0.000628911
ACVR1C	5.4462e-06	-0.584296	0.107622	0.000629403
FMN1	5.51904e-06	-0.583991	0.109062	0.000634113
SDPR	5.60984e-06	0.574283	0.110856	0.000640819
BCL9L	5.76216e-06	0.583	0.113866	0.00064959
TYR	5.86609e-06	-0.573313	0.11592	0.00064959
CPN1	5.92637e-06	-0.573091	0.117111	0.00064959
TMEM117	5.93634e-06	-0.582314	0.117308	0.00064959
IL15RA	5.95494e-06	0.572986	0.117676	0.00064959
AMOTL2	5.99549e-06	0.582085	0.118477	0.00064959
HPCAL1	5.99549e-06	0.582085	0.118477	0.00064959
KIAA0753	5.99549e-06	0.582085	0.118477	0.00064959
DACT3	6.01533e-06	-0.582009	0.118869	0.00064959
SCUBE2	6.01533e-06	-0.582009	0.118869	0.00064959
TTC7A	6.13568e-06	0.581551	0.121247	0.000655423
ATP6V1B2	6.13568e-06	-0.581551	0.121247	0.000655423
RLBP1	6.2256e-06	-0.572017	0.123024	0.000661453
GRAMD4	6.36222e-06	-0.580713	0.125724	0.000669633
RAET1E	6.38659e-06	0.571459	0.126205	0.000669633
SEMA5A	6.40425e-06	-0.58056	0.126554	0.000669633
TIMM50	6.51045e-06	-0.580179	0.128653	0.000674522
RAB38	6.53189e-06	-0.580103	0.129077	0.000674522
FLNB	6.5534e-06	0.580027	0.129502	0.000674522
SEMA6A	6.66193e-06	-0.579646	0.131646	0.000679167
EBI3	6.69366e-06	0.57043	0.132273	0.000679167
RAC2	6.72785e-06	0.579417	0.132949	0.000679167
DDX60	6.74997e-06	0.579341	0.133386	0.000679167
KRT18	6.81671e-06	0.579112	0.134705	0.000679167
GALNT3	6.83886e-06	-0.569958	0.135143	0.000679167
COL12A1	6.8391e-06	0.579036	0.135147	0.000679167
HPGD	6.92989e-06	-0.569667	0.136942	0.000683516
SOCS5	6.95206e-06	0.578654	0.13738	0.000683516
MYPN	7.11317e-06	0.578121	0.140563	0.000691328
ANXA1	7.13647e-06	0.578045	0.141024	0.000691328
EPS8L2	7.13647e-06	0.578045	0.141024	0.000691328
GLIPR1	7.30158e-06	0.577511	0.144287	0.000697173
ALPK2	7.32747e-06	0.568437	0.144798	0.000697173
XG	7.33183e-06	-0.568424	0.144884	0.000697173
BEST1	7.39753e-06	-0.577206	0.146183	0.000697173
PDE3B	7.42171e-06	-0.57713	0.14666	0.000697173
CNN2	7.44595e-06	0.577054	0.147139	0.000697173
ASAH1	7.47027e-06	-0.576977	0.14762	0.000697173
SLC6A12	7.47903e-06	-0.567984	0.147793	0.000697173
NGEF	7.80006e-06	0.567053	0.154137	0.000723354
C12orf75	7.8697e-06	0.575758	0.155513	0.000723354
ST8SIA1	7.8697e-06	-0.575758	0.155513	0.000723354
FOSL2	8.02459e-06	0.5753	0.158574	0.000732177
NRBP1	8.07685e-06	0.575148	0.159607	0.000732177
STX7	8.07685e-06	-0.575148	0.159607	0.000732177
PMAIP1	8.12943e-06	0.574995	0.160646	0.000733579
IGSF11	8.6552e-06	-0.564735	0.171035	0.000777473
LAMA1	8.7294e-06	-0.573318	0.172502	0.00078059
PHB	8.78595e-06	-0.573166	0.173619	0.000782108
ATP6V1F	8.95768e-06	-0.572708	0.177013	0.000790653
ANGPT4	9.01788e-06	0.563816	0.178202	0.000790653
P2RX7	9.04472e-06	-0.57248	0.178733	0.000790653
CHGA	9.12396e-06	-0.563553	0.180299	0.000790653
SS18L1	9.13255e-06	-0.572251	0.180468	0.000790653
ACSM4	9.14276e-06	0.563507	0.18067	0.000790653
CFLAR	9.16201e-06	0.572175	0.18105	0.000790653
COL5A1	9.31062e-06	0.571793	0.183987	0.000799984
MRPL40	9.5531e-06	-0.571184	0.188779	0.000814322
CHN2	9.55989e-06	-0.562504	0.188913	0.000814322
CHST10	9.67655e-06	-0.570879	0.191218	0.000820721
IL31RA	9.8641e-06	0.561797	0.194925	0.000833053
CKMT1B	1.0021e-05	-0.561441	0.198025	0.000842704
EFNB2	1.01205e-05	0.569811	0.199991	0.00084659
TSPAN17	1.01529e-05	0.569735	0.200632	0.00084659
PODXL	1.02508e-05	0.569506	0.202566	0.00084978
NLRC5	1.02836e-05	0.56943	0.203214	0.00084978
ARL14	1.03606e-05	0.560686	0.204735	0.00084978
FAM213A	1.04159e-05	-0.569125	0.205828	0.00084978
SLC10A3	1.04159e-05	0.569125	0.205828	0.00084978
PFN2	1.04492e-05	0.569049	0.206486	0.00084978
NRP1	1.05834e-05	0.568744	0.209139	0.00085717
KIAA1045	1.0805e-05	-0.559733	0.213517	0.000870296
TSLP	1.08336e-05	0.559673	0.214082	0.000870296
SPIN1	1.09959e-05	0.567829	0.217291	0.000878601
PRDM8	1.10648e-05	0.559193	0.218651	0.000878601
ESRP1	1.10703e-05	-0.559181	0.21876	0.000878601
ZNF75D	1.13151e-05	0.567143	0.223598	0.000888555
C12orf76	1.14234e-05	-0.566914	0.225738	0.000888555
CD63	1.14234e-05	-0.566914	0.225738	0.000888555
RUNX2	1.14234e-05	0.566914	0.225738	0.000888555
KLHL5	1.14962e-05	0.566762	0.227176	0.000888555
SYNGR1	1.14962e-05	-0.566762	0.227176	0.000888555
TOX2	1.15105e-05	0.558292	0.227459	0.000888555
NFKBIA	1.15694e-05	0.566609	0.228622	0.000889625
FAM69C	1.17909e-05	-0.557742	0.233001	0.00090256
KCNMA1	1.18289e-05	0.566076	0.233751	0.00090256
ABLIM3	1.19797e-05	0.565771	0.23673	0.000907288
FAM155A	1.19827e-05	0.557372	0.23679	0.000907288
KCTD1	1.21706e-05	0.56539	0.240504	0.000911047
LRRC16B	1.21706e-05	-0.56539	0.240504	0.000911047
SETDB2	1.21706e-05	-0.56539	0.240504	0.000911047
APOC1	1.22866e-05	-0.565161	0.242795	0.000916255
PDCD1LG2	1.24016e-05	0.556584	0.245069	0.000921358
NMI	1.25612e-05	0.564627	0.248221	0.000925717
BIRC3	1.26008e-05	0.564551	0.249005	0.000925717
PRSS23	1.26008e-05	0.564551	0.249005	0.000925717
PINK1	1.26806e-05	0.564399	0.250581	0.000928124
ZBTB4	1.29226e-05	0.563941	0.255363	0.000942348
STK32A	1.31689e-05	-0.563484	0.260231	0.000956781
SLC25A13	1.33775e-05	-0.563103	0.264354	0.000968378
FAM69B	1.37178e-05	-0.562493	0.271077	0.000985784
PDGFC	1.37178e-05	0.562493	0.271077	0.000985784
RRAS2	1.38909e-05	0.562188	0.274498	0.000994608
WNT7A	1.40204e-05	0.553754	0.277057	0.00100026
SAMD9L	1.41102e-05	0.561807	0.278831	0.00100226
SNCG	1.41544e-05	0.561731	0.279705	0.00100226
KRT27	1.42006e-05	-0.553458	0.280618	0.00100226
SYP	1.45584e-05	-0.561044	0.287689	0.0010192
CPB2	1.45952e-05	-0.552822	0.288417	0.0010192
OASL	1.45954e-05	0.552821	0.28842	0.0010192
ASAP2	1.48801e-05	0.560511	0.294045	0.00103542
CDK2	1.502e-05	-0.560282	0.296809	0.00104149
POLR2F	1.51307e-05	-0.551983	0.298998	0.0010455
IRX6	1.52453e-05	-0.551807	0.301263	0.00104975
NHS	1.56545e-05	0.551189	0.309348	0.00107418
ATP10A	1.61284e-05	-0.550491	0.318713	0.00110287
KCNG3	1.62846e-05	-0.5583	0.3218	0.00110933
PLAUR	1.63352e-05	0.558224	0.322799	0.00110933
ZBTB8B	1.64468e-05	-0.550033	0.325005	0.00111309
KIN	1.65902e-05	-0.557843	0.327839	0.00111896
TCFL5	1.67969e-05	-0.557538	0.331924	0.00112905
TMEM98	1.7006e-05	-0.557233	0.336056	0.0011389
ITGA5	1.70587e-05	0.557156	0.337096	0.0011389
BCL10	1.72175e-05	0.556928	0.340236	0.00114179
TSPAN33	1.72175e-05	-0.556928	0.340236	0.00114179
PPP4R1	1.73778e-05	0.556699	0.343402	0.00114856
C5orf56	1.75936e-05	0.556394	0.347667	0.00115895
TRIM21	1.78669e-05	0.556013	0.353068	0.00117304
HDAC7	1.80328e-05	0.555784	0.356345	0.00118001
TAP1	1.81441e-05	0.555632	0.358546	0.00118338
D4S234E	1.84254e-05	-0.555251	0.364104	0.00119777
IRAK2	1.8539e-05	0.555098	0.36635	0.00120121
PSMB9	1.86533e-05	0.554946	0.368608	0.00120466
C4orf22	1.88982e-05	0.546758	0.373448	0.0012165
RAB36	1.91568e-05	0.546435	0.378557	0.00122914
GPR68	1.93817e-05	0.546158	0.383002	0.00123352
STEAP3	1.94123e-05	0.553955	0.383606	0.00123352
TMC6	1.94123e-05	-0.553955	0.383606	0.00123352
SECTM1	1.95349e-05	0.545971	0.386029	0.00123733
SCML4	1.98539e-05	-0.545586	0.392333	0.00125352
KLHL41	1.99873e-05	-0.545427	0.39497	0.00125793
ST13	2.00769e-05	-0.553116	0.396739	0.00125955
STAC	2.07112e-05	0.544579	0.409273	0.00129523
PTGER2	2.11194e-05	0.544113	0.417341	0.00130997
B9D2	2.11457e-05	0.55182	0.41786	0.00130997
IVNS1ABP	2.11457e-05	-0.55182	0.41786	0.00130997
VCL	2.12748e-05	0.551668	0.420412	0.00131385
TMEM170B	2.14047e-05	-0.551515	0.422979	0.00131776
ANLN	2.15354e-05	0.551363	0.425561	0.00132168
NRTN	2.18754e-05	-0.543271	0.432279	0.00133839
YWHAQ	2.24708e-05	0.550295	0.444046	0.00137012
CPA4	2.25326e-05	0.542561	0.445266	0.00137012
ALDH4A1	2.2745e-05	-0.54999	0.449463	0.00137457
LRP4	2.2745e-05	-0.54999	0.449463	0.00137457
FCGR2B	2.29116e-05	-0.54216	0.452756	0.00137526
FOSL1	2.30222e-05	0.549686	0.454941	0.00137526
CLCN5	2.30222e-05	-0.549686	0.454941	0.00137526
FAM171A1	2.30347e-05	0.542031	0.455189	0.00137526
CELF2	2.33731e-05	-0.549304	0.461877	0.00139127
PLAA	2.35149e-05	0.549152	0.464678	0.00139389
XAF1	2.35583e-05	0.54149	0.465535	0.00139389
RHOQ	2.37291e-05	-0.548923	0.46891	0.0013998
SLC35B4	2.38009e-05	-0.548847	0.470329	0.00139986
CATSPER1	2.38728e-05	0.548771	0.471751	0.00139993
DUSP15	2.4612e-05	-0.540433	0.486358	0.001439
UBA7	2.47526e-05	0.547856	0.489137	0.00144296
IFIT2	2.49022e-05	0.547703	0.492092	0.0014474
IL6R	2.5128e-05	-0.547475	0.496555	0.00145212
P2RY6	2.51428e-05	0.539917	0.496848	0.00145212
IDI1	2.52038e-05	-0.547399	0.498051	0.00145212
TMEM156	2.53859e-05	0.539684	0.50165	0.00145836
ACSL3	2.55855e-05	-0.547017	0.505595	0.00146557
GGN	2.57207e-05	0.539366	0.508266	0.00146905
RAB17	2.62075e-05	-0.546407	0.517886	0.00149254
EDNRB	2.65237e-05	-0.546103	0.524135	0.00150621
BCAS4	2.66832e-05	0.54595	0.527286	0.00150661
SLC25A4	2.66832e-05	-0.54595	0.527286	0.00150661
STC1	2.68435e-05	0.545798	0.530454	0.00151134
PLIN3	2.74117e-05	0.545264	0.541683	0.00153895
AKR1B10	2.79121e-05	0.537376	0.55157	0.0015597
OR2T8	2.79392e-05	0.537352	0.552106	0.0015597
CREB3	2.80748e-05	0.544654	0.554786	0.00156286
SIPA1L1	2.81587e-05	0.544578	0.556444	0.00156312
MYOF	2.83272e-05	0.544425	0.559775	0.0015637
STXBP6	2.83272e-05	-0.544425	0.559775	0.0015637
BIRC7	2.85146e-05	-0.536854	0.563477	0.00156965
GCSH	2.95335e-05	-0.543358	0.583612	0.00162123
FAM83G	2.9631e-05	0.535913	0.585538	0.00162207
HEY2	2.98868e-05	-0.543053	0.590594	0.00163156
PCNXL2	3.01544e-05	0.542824	0.595881	0.00163381
PSG5	3.02066e-05	0.535441	0.596913	0.00163381
NKAIN4	3.02671e-05	-0.535392	0.598107	0.00163381
APOH	3.03121e-05	0.535355	0.598997	0.00163381
FHIT	3.04241e-05	-0.542596	0.601212	0.00163381
KEAP1	3.04241e-05	0.542596	0.601212	0.00163381
WDPCP	3.05146e-05	-0.54252	0.602998	0.00163422
LASP1	3.07873e-05	0.542291	0.608388	0.00164438
ARRDC3	3.10623e-05	0.542062	0.613823	0.00165015
ANKRD54	3.10623e-05	-0.542062	0.613823	0.00165015
LGALS3	3.15258e-05	-0.541681	0.622981	0.00166719
CLIC2	3.15518e-05	0.534368	0.623496	0.00166719
PODXL2	3.26643e-05	-0.540766	0.645479	0.00172136
DZIP3	3.30522e-05	-0.540461	0.653144	0.00173257
SORT1	3.30522e-05	-0.540461	0.653144	0.00173257
BAG3	3.32477e-05	0.540309	0.657008	0.00173362
LRRC8B	3.32477e-05	-0.540309	0.657008	0.00173362
TSPAN3	3.38408e-05	-0.539851	0.668729	0.0017599
PIR	3.39406e-05	-0.539775	0.670701	0.00176004
ADRBK2	3.40217e-05	-0.532505	0.672303	0.00176004
TPBG	3.46469e-05	0.539241	0.684657	0.00178771
FAT4	3.50461e-05	0.531768	0.692547	0.00180343
PLA1A	3.51341e-05	-0.531706	0.694285	0.00180343
BCAR3	3.56795e-05	0.538479	0.705062	0.00182668
LOXL2	3.57843e-05	0.538403	0.707133	0.00182731
NAGLU	3.59948e-05	-0.53825	0.711293	0.00183332
MCFD2	3.61004e-05	0.538174	0.713381	0.00183398
CLDN4	3.69562e-05	0.537564	0.730291	0.00187264
SLC16A12	3.72938e-05	0.530219	0.736962	0.00188491
LRP1B	3.88306e-05	0.529209	0.767332	0.00195294
APOL6	3.88375e-05	0.536268	0.767467	0.00195294
SSC5D	3.92928e-05	0.535963	0.776465	0.00196583
VAV2	3.92928e-05	0.535963	0.776465	0.00196583
CKAP2L	4.01016e-05	0.53543	0.792447	0.00200123
KLHL24	4.02184e-05	-0.535354	0.794755	0.002002
ITGA3	4.03355e-05	0.535277	0.797069	0.00200279
RENBP	4.04529e-05	-0.535201	0.79939	0.00200358
GPR161	4.05706e-05	-0.535125	0.801716	0.00200439
FBXO39	4.15592e-05	0.527503	0.821251	0.00204811
CAPN3	4.19468e-05	-0.527269	0.828911	0.00206207
ATP6V0A1	4.21304e-05	-0.534134	0.832538	0.00206596
CT62	4.2453e-05	0.526966	0.838913	0.00206859
EHD1	4.24981e-05	0.533905	0.839805	0.00206859
LONP2	4.24981e-05	-0.533905	0.839805	0.00206859
KRT13	4.29545e-05	0.52667	0.848824	0.00208242
RPUSD3	4.2993e-05	-0.5336	0.849585	0.00208242
GNPTAB	4.33677e-05	-0.533371	0.856989	0.00209543
HFM1	4.35363e-05	-0.52633	0.860321	0.00209845
TNFRSF1A	4.37454e-05	0.533143	0.864453	0.0021034
COL20A1	4.44125e-05	-0.525826	0.877635	0.00213029
ROPN1	4.45736e-05	-0.525734	0.880818	0.00213284
MC1R	4.52869e-05	-0.532228	0.894915	0.00216174
IDO1	4.55727e-05	0.525172	0.900561	0.00217014
MSI1	4.56968e-05	-0.525103	0.903014	0.00217082
MT2A	4.63423e-05	0.531618	0.915771	0.0021962
FAM196B	4.68974e-05	0.524444	0.92674	0.00221719
TBC1D16	4.70134e-05	-0.531237	0.929033	0.00221737
CPA5	4.76113e-05	0.524059	0.940846	0.00224022
GAB2	4.82442e-05	-0.530551	0.953353	0.00226461
BTBD1	4.8661e-05	-0.530322	0.96159	0.00227877
NXNL2	4.89144e-05	0.523371	0.966597	0.00228521
GATA2	4.93631e-05	0.529941	0.975465	0.0022913
MLANA	4.93631e-05	-0.529941	0.975465	0.0022913
MFNG	4.93924e-05	0.523123	0.976043	0.0022913
C11orf68	4.97889e-05	0.529712	0.983878	0.00230428
SERPINB8	5.0506e-05	0.529331	0.998049	0.00233201
UBAP1L	5.06506e-05	-0.529255	1	0.00233323
WDFY3	5.07955e-05	0.529179	1	0.00233415
AKIRIN2	5.09408e-05	0.529102	1	0.00233415
ASB2	5.11801e-05	-0.522213	1	0.00233415
TRPC4	5.12328e-05	0.522187	1	0.00233415
PTGER4	5.13791e-05	0.528874	1	0.00233415
MAST1	5.13791e-05	-0.528874	1	0.00233415
KLHL6	5.17156e-05	-0.521946	1	0.00234405
SPOPL	5.1969e-05	0.528569	1	0.00235014
JUN	5.22662e-05	0.528416	1	0.00235819
ANXA5	5.25651e-05	-0.528264	1	0.00236627
BCL7A	5.27151e-05	-0.528188	1	0.00236763
SLC44A3	5.28655e-05	-0.528111	1	0.002369
MAN1A1	5.33647e-05	0.521141	1	0.00238532
SOX6	5.3471e-05	-0.527806	1	0.00238532
TMEM71	5.4151e-05	0.520764	1	0.00241021
SERPINB7	5.46494e-05	0.520529	1	0.00242672
SREBF2	5.48571e-05	-0.52712	1	0.00242672
FLNA	5.50131e-05	0.527044	1	0.00242672
SMAD3	5.50131e-05	0.527044	1	0.00242672
AKR1C1	5.53165e-05	0.520216	1	0.00243119
E2F7	5.54837e-05	0.526815	1	0.00243119
SLIT2	5.54837e-05	0.526815	1	0.00243119
ARMC3	5.56535e-05	-0.520059	1	0.00243324
FN3K	5.61169e-05	-0.52651	1	0.00244809
FEZ2	5.62763e-05	0.526434	1	0.00244963
WDR61	5.65962e-05	-0.526282	1	0.00245433
HLA.B	5.67568e-05	0.526205	1	0.00245433
IGSF8	5.67568e-05	-0.526205	1	0.00245433
NHP2L1	5.69178e-05	-0.526129	1	0.00245506
NCK2	5.70793e-05	-0.526053	1	0.00245506
RAB6B	5.72411e-05	-0.525977	1	0.00245506
BDKRB2	5.72706e-05	0.51932	1	0.00245506
SNX10	5.83861e-05	-0.525443	1	0.00249746
EVI2B	5.8645e-05	0.518706	1	0.00249772
TPBGL	5.8645e-05	-0.518706	1	0.00249772
CDH20	5.92158e-05	0.518455	1	0.00251661
SLC11A2	5.95522e-05	-0.524909	1	0.00252547
SNCA	5.98893e-05	-0.524757	1	0.00253433
CPEB1	6.00585e-05	-0.524681	1	0.00253606
PSME1	6.05688e-05	0.524452	1	0.00255216
ANXA8	6.09637e-05	0.5177	1	0.00256333
PSMB8	6.12554e-05	0.524147	1	0.00257013
RGS7	6.17509e-05	0.517367	1	0.00258543
RAB27B	6.22399e-05	0.517162	1	0.00260039
ALDH1A1	6.36868e-05	-0.516563	1	0.00264988
BMPER	6.36926e-05	0.516561	1	0.00264988
LTBP2	6.40743e-05	0.522927	1	0.00266016
KLF10	6.44349e-05	0.522775	1	0.00266791
PTCRA	6.4531e-05	-0.51622	1	0.00266791
SCARB1	6.55281e-05	-0.522318	1	0.00270348
IGDCC3	6.57924e-05	-0.515714	1	0.00270414
C1orf95	6.58178e-05	-0.515704	1	0.00270414
FGF5	6.63352e-05	0.515499	1	0.00271974
TMEM127	6.66385e-05	0.52186	1	0.00272652
KIAA1598	6.72001e-05	-0.521631	1	0.00274018
TRIM8	6.73883e-05	0.521555	1	0.00274018
AP1S3	6.73883e-05	-0.521555	1	0.00274018
TSPYL1	6.7577e-05	0.521479	1	0.00274221
ANK2	6.83365e-05	-0.521174	1	0.00276735
BCL2A1	6.86787e-05	-0.51459	1	0.00277552
TUFT1	6.9297e-05	0.520793	1	0.00279479
NDRG2	6.94906e-05	-0.520717	1	0.00279488
SAMD11	6.95822e-05	0.514247	1	0.00279488
CDH13	6.99725e-05	0.5141	1	0.00280326
MYO10	7.00744e-05	-0.520488	1	0.00280326
PKP3	7.04966e-05	0.513903	1	0.00280409
AKR1C4	7.05098e-05	0.513899	1	0.00280409
BDH1	7.06627e-05	-0.520259	1	0.00280409
HAS2	7.06627e-05	-0.520259	1	0.00280409
SYNJ2	7.10574e-05	0.520107	1	0.0028141
CDC16	7.16533e-05	-0.519878	1	0.00282558
GCAT	7.16533e-05	-0.519878	1	0.00282558
MECOM	7.17761e-05	0.51343	1	0.00282558
POLR3G	7.22538e-05	-0.519649	1	0.00283873
FAF2	7.28589e-05	0.519421	1	0.00285682
MAP3K7CL	7.36494e-05	0.512751	1	0.0028821
VSTM1	7.44585e-05	0.512463	1	0.00290057
MAML1	7.47025e-05	0.518735	1	0.00290057
OGDHL	7.47025e-05	-0.518735	1	0.00290057
OR6V1	7.47085e-05	-0.512374	1	0.00290057
NAB2	7.491e-05	-0.518658	1	0.00290269
TLE4	7.57452e-05	0.518353	1	0.00292931
SOX9	7.59994e-05	0.511921	1	0.0029334
CAB39	7.72275e-05	0.51782	1	0.00297499
AJUBA	7.74414e-05	0.517743	1	0.00297743
DEPDC5	7.85193e-05	-0.517362	1	0.00301301
L3MBTL4	7.87048e-05	-0.510995	1	0.00301427
SLC5A9	7.89126e-05	-0.510925	1	0.00301638
TXNRD1	8.00515e-05	0.516829	1	0.00305401
SLC24A5	8.0706e-05	-0.510328	1	0.00306355
PPEF1	8.09781e-05	-0.510238	1	0.00306355
HSD17B7	8.11627e-05	-0.516447	1	0.00306355
KNOP1	8.11627e-05	-0.516447	1	0.00306355
UHRF1BP1L	8.11627e-05	0.516447	1	0.00306355
IFT81	8.13867e-05	-0.516371	1	0.00306355
UBAP1	8.13867e-05	0.516371	1	0.00306355
NFIX	8.2515e-05	0.51599	1	0.00310012
GJC3	8.31989e-05	-0.515761	1	0.0031167
HEG1	8.3428e-05	0.515685	1	0.0031167
GYG2	8.34294e-05	-0.509444	1	0.0031167
GULP1	8.36577e-05	0.515609	1	0.00311933
PPFIBP2	8.4815e-05	-0.515228	1	0.00315059
ZFYVE16	8.4815e-05	-0.515228	1	0.00315059
DIO2	8.56044e-05	0.508758	1	0.00317395
HIVEP1	8.5987e-05	0.514847	1	0.00318216
SETD7	8.69353e-05	0.514542	1	0.00320608
PRR5	8.69576e-05	-0.508338	1	0.00320608
ARL14EPL	8.82064e-05	0.507957	1	0.00324606
EPHB2	8.99786e-05	0.507423	1	0.00330512
RFPL2	9.05759e-05	-0.507246	1	0.00332089
DOCK5	9.10741e-05	0.513246	1	0.00333297
KCNN2	9.24456e-05	-0.506697	1	0.00337691
MAP6D1	9.35926e-05	-0.512483	1	0.0034125
FAM129B	9.38479e-05	0.512407	1	0.0034153
SFTPC	9.42353e-05	-0.506181	1	0.0034153
ARHGAP23	9.42895e-05	0.506166	1	0.0034153
GLIS3	9.43605e-05	0.512255	1	0.0034153
NME4	9.53935e-05	-0.51195	1	0.00344578
ABCB5	9.55514e-05	-0.505807	1	0.00344578
CARD10	9.74907e-05	0.51134	1	0.00350931
HRK	9.89435e-05	-0.504865	1	0.00354754
BTK	9.90724e-05	-0.50483	1	0.00354754
TESK2	9.90914e-05	-0.510882	1	0.00354754
DRAP1	9.96303e-05	0.51073	1	0.00355396
GYPC	9.96303e-05	-0.51073	1	0.00355396
FAM32A	0.000100172	0.510577	1	0.00356043
NIPAL1	0.000100172	0.510577	1	0.00356043
PLP2	0.000102365	0.509968	1	0.00361887
OPA1	0.000102365	-0.509968	1	0.00361887
RNF185	0.000102365	-0.509968	1	0.00361887
SRSF12	0.000102866	-0.503812	1	0.00363006
LINS	0.000103479	-0.509663	1	0.0036387
MDH1	0.000103479	-0.509663	1	0.0036387
CDK5R1	0.000106598	-0.508824	1	0.00374172
ACSL5	0.000106944	0.502756	1	0.00374722
HSF4	0.000107464	-0.508595	1	0.00375875
SERTAD1	0.000108044	0.508443	1	0.00377238
TATDN3	0.000109214	-0.508138	1	0.00380335
MAT2A	0.000109508	0.508062	1	0.00380335
RUFY1	0.000109508	0.508062	1	0.00380335
ETHE1	0.000110693	0.507757	1	0.00383774
CST1	0.000111349	-0.501656	1	0.00385372
RRAGD	0.000111889	-0.507452	1	0.00386565
PSG9	0.000113199	0.501205	1	0.00390407
F2RL2	0.000113523	0.501127	1	0.00390792
PLK2	0.000113706	0.506994	1	0.00390792
MYO7B	0.000113935	0.501028	1	0.00390899
GATA3	0.000114964	0.500782	1	0.00393747
TRAPPC2L	0.00011555	-0.506537	1	0.00395068
PACSIN2	0.00011586	-0.506461	1	0.00395443
PID1	0.000117185	0.500257	1	0.00397646
LDHD	0.000117225	-0.500248	1	0.00397646
CCDC80	0.000117421	0.50608	1	0.00397646
PRDM1	0.00011747	0.500191	1	0.00397646
ADAM8	0.000117511	0.500181	1	0.00397646
FAM222B	0.000118367	-0.505851	1	0.00399562
FBLIM1	0.000118494	0.499952	1	0.00399562
ROPN1B	0.000118684	-0.505775	1	0.00399562
FBXO7	0.000119959	-0.50547	1	0.00403169
FAM105A	0.000120526	0.499485	1	0.00404119
HECW2	0.000120651	0.499457	1	0.00404119
CARD6	0.000121154	0.499342	1	0.00404854
STX1B	0.00012128	0.499314	1	0.00404854
TAGLN	0.000121571	0.505089	1	0.00405141
LRRC28	0.000121896	-0.505012	1	0.00405539
SLC25A17	0.000122221	-0.504936	1	0.00405939
ASPH	0.000122875	0.504784	1	0.00407425
TTYH2	0.000123532	-0.504631	1	0.00408916
FAM149A	0.000123825	-0.498742	1	0.00409203
NEDD4	0.000126527	0.503945	1	0.00417433
MYEOV	0.00012754	0.503716	1	0.00420074
CTDNEP1	0.00012822	0.503564	1	0.0042091
MICAL1	0.00012822	-0.503564	1	0.0042091
FAM210B	0.000128561	-0.503488	1	0.00421329
TXN2	0.000129245	-0.503335	1	0.00422872
VIT	0.000129805	0.49744	1	0.00424001
DENND3	0.000131319	0.502878	1	0.00427533
TMTC3	0.000131319	0.502878	1	0.00427533
COL25A1	0.000131665	-0.497046	1	0.00427955
ATRNL1	0.000132017	-0.502725	1	0.00428394
TIPARP	0.000132367	0.502649	1	0.00428827
LAMC3	0.000132849	-0.496798	1	0.00429683
MCL1	0.000133777	0.502344	1	0.00431978
PFN1	0.000134487	0.502192	1	0.00433562
TRAK1	0.000134843	-0.502115	1	0.00434003
GOLPH3L	0.000135559	0.501963	1	0.00435595
GAPDHS	0.000136151	-0.496116	1	0.00435779
CLDN14	0.000136198	-0.496107	1	0.00435779
GLIS2	0.000136277	0.501811	1	0.00435779
HTR7	0.000137362	0.501582	1	0.00437577
MYH15	0.000137721	0.495798	1	0.00437577
WDR44	0.000137725	0.501506	1	0.00437577
MLYCD	0.000137725	-0.501506	1	0.00437577
TLN1	0.000139187	0.501201	1	0.00441512
TMEM150C	0.000141351	-0.495073	1	0.00447656
BTN2A1	0.000142154	0.500591	1	0.00449187
TNFSF18	0.000142289	0.494889	1	0.00449187
MYH14	0.000142665	-0.494815	1	0.00449658
ADCY1	0.000144038	-0.50021	1	0.0045326
NEDD9	0.000144417	-0.500133	1	0.00453732
FARP1	0.000145561	-0.499905	1	0.0045523
SPATS2L	0.000145561	0.499905	1	0.0045523
SHISA3	0.000145769	0.494214	1	0.0045523
VEGFC	0.000145815	0.494205	1	0.0045523
CCDC85B	0.000146328	0.499752	1	0.00455392
ZYX	0.000146328	0.499752	1	0.00455392
DTNBP1	0.000147099	-0.4996	1	0.00457072
FAT3	0.000147541	0.493876	1	0.00457724
FOXD1	0.000148263	0.499371	1	0.00458795
CACNA1D	0.00014835	-0.493723	1	0.00458795
ATP6V1C1	0.000149043	-0.499219	1	0.00460039
PAG1	0.000149434	-0.499142	1	0.00460039
VGLL3	0.000149451	0.493516	1	0.00460039
TMEM154	0.000150382	0.493342	1	0.00462185
GPNMB	0.000152601	-0.498532	1	0.0046755
MPRIP	0.000152601	0.498532	1	0.0046755
PTX3	0.00015314	0.492833	1	0.00468477
ITGA9	0.000153402	-0.49838	1	0.00468552
PTP4A3	0.000154229	-0.492634	1	0.00470352
ADAM28	0.000155636	0.492379	1	0.00473909
MAP3K14	0.000156646	0.49777	1	0.00476251
SLC24A4	0.00015748	-0.492047	1	0.00478052
PROM1	0.000157953	-0.491963	1	0.00478753
LTBP3	0.000158705	0.497389	1	0.00480294
NT5C1B	0.000159528	0.491684	1	0.00480599
LRRC49	0.000159535	0.497237	1	0.00480599
ASRGL1	0.000159535	-0.497237	1	0.00480599
SHB	0.000159952	0.49716	1	0.00481121
YAP1	0.000160788	0.497008	1	0.00482902
SLC14A1	0.000161421	0.491351	1	0.00483224
CACNG4	0.000161506	0.491336	1	0.00483224
ABHD10	0.000161629	-0.496855	1	0.00483224
PDZRN3	0.000162051	-0.496779	1	0.00483753
C16orf89	0.000162333	-0.491192	1	0.00483865
PTPN14	0.000163322	0.49655	1	0.00486079
SLC38A2	0.000165031	0.496245	1	0.00490428
C2orf72	0.000166324	-0.496017	1	0.00493528
PI15	0.000169596	-0.489955	1	0.00501632
NR2F2	0.000169817	0.495407	1	0.00501632
ZNF330	0.000169817	-0.495407	1	0.00501632
GHR	0.000170258	-0.495331	1	0.00502185
PLAU	0.00017161	0.489621	1	0.00505418
BCL3	0.00017248	0.494949	1	0.00506472
PARL	0.00017248	-0.494949	1	0.00506472
SORCS2	0.000174493	0.489148	1	0.00511555
RBM22	0.000174729	0.494568	1	0.00511555
ERP29	0.000175182	-0.494492	1	0.00512123
ELMOD2	0.000176548	-0.494263	1	0.00515352
IDS	0.000177923	0.494035	1	0.005186
WNT5A	0.000179308	0.493806	1	0.00521867
TCIRG1	0.000182578	0.493272	1	0.00530603
FAM189A2	0.000183746	-0.487678	1	0.00531598
EPHA2	0.000183996	0.493044	1	0.00531598
KCNJ10	0.000183996	-0.493044	1	0.00531598
TFPI	0.000183996	0.493044	1	0.00531598
NXPH2	0.000185121	0.487466	1	0.00534068
FAM20C	0.000185424	0.492815	1	0.00534162
CDS2	0.000186382	-0.492662	1	0.00535962
C16orf96	0.00018682	-0.487205	1	0.00535962
MERTK	0.000186862	-0.492586	1	0.00535962
VPS33B	0.000188796	-0.492281	1	0.00540723
THNSL1	0.000192224	-0.491748	1	0.00549745
TBRG4	0.000193711	-0.491519	1	0.00553195
DLG5	0.000194708	0.491366	1	0.00555039
KRT15	0.000194918	0.485991	1	0.00555039
DDI2	0.000197727	-0.490909	1	0.00562051
STAT1	0.000198234	0.490833	1	0.00562051
TMEM97	0.000198234	-0.490833	1	0.00562051
PARP4	0.000200275	0.490528	1	0.00567025
FOXL1	0.000200936	0.485118	1	0.00568081
STRADB	0.000201303	-0.490375	1	0.00568306
MOGAT1	0.000202305	-0.484923	1	0.0057032
ADGRE5	0.000203373	0.490071	1	0.005717
FNIP2	0.000203373	-0.490071	1	0.005717
ADGRG6	0.000204415	-0.489918	1	0.00572232
JAK1	0.000204415	0.489918	1	0.00572232
TAP2	0.000204938	0.489842	1	0.00572232
SPDL1	0.000205462	0.489766	1	0.00572232
GGT7	0.000205462	-0.489766	1	0.00572232
MYZAP	0.000205515	0.48447	1	0.00572232
TRIML2	0.000205589	0.48446	1	0.00572232
MARCH4	0.000206801	0.48429	1	0.00574658
SACM1L	0.000207042	-0.489537	1	0.00574658
KCNAB1	0.0002097	-0.489156	1	0.00580677
IL15	0.000209798	0.483875	1	0.00580677
GARNL3	0.000210772	-0.489003	1	0.00582556
METTL9	0.000211849	-0.488851	1	0.00584715
TGFBR1	0.000212931	-0.488698	1	0.00586881
C6orf118	0.00021498	0.483171	1	0.00591705
CASC10	0.000218417	0.487936	1	0.00600328
ANKRD13A	0.00021953	0.487783	1	0.00602548
CAV2	0.000220647	0.487631	1	0.00604776
FAS	0.000221223	0.482342	1	0.00605335
KCNH4	0.000221747	-0.482273	1	0.00605335
CAPN2	0.00022177	0.487479	1	0.00605335
GSS	0.000222899	-0.487326	1	0.00607362
KCNK1	0.000223128	0.482093	1	0.00607362
EFR3B	0.000224601	-0.487097	1	0.00610531
ULBP2	0.000225171	0.487021	1	0.00611239
C15orf27	0.000225742	-0.486945	1	0.0061195
IGFBP6	0.000228619	0.486564	1	0.00618899
ATP7B	0.000229198	-0.486488	1	0.00619619
ZNF106	0.000231529	-0.486183	1	0.00625065
KANK2	0.000232115	0.486106	1	0.0062555
PTPRE	0.000232838	0.480855	1	0.0062555
SLC5A4	0.000233073	-0.480826	1	0.0062555
ORC2	0.000233291	0.485954	1	0.0062555
CHST6	0.000233291	-0.485954	1	0.0062555
ATP1A1	0.000233881	-0.485878	1	0.00626282
FAM174B	0.000235066	-0.485725	1	0.00628602
RP11.683L23.1	0.000237999	-0.480216	1	0.00634867
PLTP	0.000238051	-0.485344	1	0.00634867
SRRD	0.000239858	-0.485115	1	0.00637003
SAMD14	0.000240033	0.479968	1	0.00637003
GPR63	0.000240208	0.479947	1	0.00637003
CREM	0.000240464	-0.485039	1	0.00637003
FDFT1	0.000240464	-0.485039	1	0.00637003
KIAA1467	0.000242288	-0.48481	1	0.0064012
UBL3	0.000242288	-0.48481	1	0.0064012
SIX5	0.000242899	0.484734	1	0.00640877
VCP	0.000245357	0.484429	1	0.00646499
BNIP3	0.000245975	0.484353	1	0.00647265
COL21A1	0.000248647	0.478937	1	0.00652976
ADTRP	0.000248806	0.478918	1	0.00652976
PXN	0.000250341	0.483819	1	0.00655263
TYRO3	0.000250341	-0.483819	1	0.00655263
PFKFB2	0.00025097	-0.483743	1	0.00656042
SPIRE2	0.000251601	-0.483667	1	0.00656822
LINGO1	0.000252867	-0.483514	1	0.00659257
TMED10	0.000253503	-0.483438	1	0.00659387
CDYL2	0.000253585	0.47836	1	0.00659387
CXCL10	0.000254633	0.478239	1	0.0066075
GNA11	0.000254778	0.483286	1	0.0066075
AHNAK	0.000257345	0.482981	1	0.00665589
C1orf21	0.000257991	-0.482905	1	0.00665589
FBXW11	0.000257991	0.482905	1	0.00665589
ZNF697	0.000257991	-0.482905	1	0.00665589
ERBB3	0.000258638	-0.482828	1	0.00666388
CCL18	0.000261843	-0.477419	1	0.00673025
HEXA	0.000261895	-0.482447	1	0.00673025
ST18	0.000262484	0.477347	1	0.00673663
MRO	0.000263002	-0.477289	1	0.00674116
PARVB	0.00026519	-0.482066	1	0.00678844
NRG3	0.000267849	-0.476751	1	0.00684765
ENTHD1	0.000269766	-0.47654	1	0.00688776
SDK1	0.00027131	0.476372	1	0.00691823
TIAM1	0.000273252	0.481151	1	0.0069582
GLMP	0.000273934	-0.481075	1	0.0069582
SNRPD3	0.000273934	-0.481075	1	0.0069582
CD44	0.000274617	0.480999	1	0.00696661
ARHGAP15	0.000276203	-0.475844	1	0.00699786
AGAP3	0.000277367	-0.480694	1	0.00700936
SS18	0.000277367	0.480694	1	0.00700936
FZD2	0.000278751	0.480541	1	0.00702637
ATP6V1E1	0.000278751	-0.480541	1	0.00702637
S100A2	0.000280141	0.480389	1	0.00705242
SGK3	0.000280839	-0.480313	1	0.00706099
CES5A	0.000281941	-0.475235	1	0.00707968
FAM222A	0.000282941	-0.480084	1	0.00709578
MOB3B	0.000283964	-0.475023	1	0.00710409
CD320	0.00028435	-0.479931	1	0.00710409
MBP	0.00028435	-0.479931	1	0.00710409
OLR1	0.000285393	0.474874	1	0.00712114
KCNJ13	0.000286342	-0.474776	1	0.00713016
TMOD3	0.000286477	0.479703	1	0.00713016
NDC80	0.000287188	0.479626	1	0.00713889
TNFRSF11B	0.000288587	0.474544	1	0.00716463
ZNF346	0.000289334	0.479398	1	0.00716911
RIMS1	0.000289493	0.474451	1	0.00716911
SLC20A1	0.000290052	0.479322	1	0.00717399
C3	0.00029146	0.47425	1	0.00719979
WDFY1	0.000292217	-0.479093	1	0.00720949
PDGFRB	0.000295221	0.473869	1	0.00727451
PBX1	0.000296242	0.473766	1	0.00729058
VPS16	0.000301026	-0.478178	1	0.0073991
MTUS1	0.000301771	-0.478102	1	0.00740819
NUDT3	0.000302517	-0.478026	1	0.0074173
CYB561	0.000303266	0.477949	1	0.00742644
APEH	0.000304767	-0.477797	1	0.00745397
ACTN4	0.000307791	0.477492	1	0.00751861
AGPAT6	0.000308551	-0.477416	1	0.00752787
SYT1	0.000309014	0.472508	1	0.00752988
FAM167B	0.000310841	-0.477187	1	0.00755593
PSG1	0.000311766	0.472243	1	0.00755593
GPR20	0.000312221	0.472199	1	0.00755593
SCGB1D2	0.000312367	-0.472185	1	0.00755593
BDH2	0.000312377	-0.477034	1	0.00755593
PARD6G	0.000312377	-0.477034	1	0.00755593
ALOXE3	0.000313692	0.472058	1	0.00757846
GRM8	0.000314585	0.471973	1	0.00759074
CTDSP1	0.000317026	0.476577	1	0.00763101
RASSF3	0.000317026	-0.476577	1	0.00763101
MAD2L1BP	0.000317807	-0.476501	1	0.00763236
FASLG	0.000317854	0.471664	1	0.00763236
SH3RF2	0.000318444	0.471608	1	0.00763725
ARMC4	0.000320452	0.47142	1	0.00767609
COL13A1	0.00032117	0.471353	1	0.00768398
ATP11AUN	0.00032159	-0.471314	1	0.00768471
GOLGA4	0.000322529	-0.476043	1	0.00769785
ENPP1	0.000324117	-0.475891	1	0.00772642
LIMK2	0.000326513	-0.475662	1	0.00777416
RPS6KA5	0.000328119	-0.47551	1	0.007803
SCAF8	0.000328925	0.475434	1	0.00780838
CPNE7	0.0003295	0.470584	1	0.00780838
DNAH5	0.000329531	0.470582	1	0.00780838
MAP2K1	0.000332981	0.475052	1	0.00788068
NHSL1	0.000334616	-0.4749	1	0.00790991
STYK1	0.000336859	0.46992	1	0.0079492
GFM1	0.000337083	-0.474671	1	0.0079492
TNFRSF25	0.000339566	0.474443	1	0.00799821
MYADM	0.000342065	0.474214	1	0.00804749
BIN3	0.000345424	-0.473909	1	0.00811685
SLC38A7	0.000346269	-0.473833	1	0.00812703
CAMK2N1	0.000347115	0.473756	1	0.00813723
CCDC68	0.000347869	0.46895	1	0.00813781
PLCG1	0.000347963	-0.47368	1	0.00813781
PDLIM5	0.000352233	0.473299	1	0.00822792
CRABP2	0.000354817	0.47307	1	0.00827851
LDHB	0.000355682	-0.472994	1	0.00828891
TMEM43	0.000357419	0.472842	1	0.00831957
KRT23	0.000358081	-0.468075	1	0.00832024
PLXNC1	0.00035829	-0.472765	1	0.00832024
SPANXD	0.000358888	0.468007	1	0.00832434
CXCL2	0.000362288	0.467721	1	0.00838812
JAM2	0.000362486	0.467705	1	0.00838812
HHIPL2	0.000363878	0.467589	1	0.00841047
PKP2	0.000365143	0.467483	1	0.00842985
WFDC1	0.000365713	-0.467436	1	0.00843316
GPRC5B	0.000366217	-0.472079	1	0.00843495
TBX2	0.000368001	-0.471927	1	0.00845932
CCDC110	0.000368131	-0.467236	1	0.00845932
KCTD18	0.000369792	0.471774	1	0.0084876
SDF2L1	0.00037069	-0.471698	1	0.00848851
VGF	0.00037069	-0.471698	1	0.00848851
ALKBH7	0.000371591	-0.471622	1	0.00849928
CD163	0.000372297	0.466894	1	0.00850559
MANEA	0.000373398	0.471469	1	0.00852089
ADCY2	0.000376365	-0.466564	1	0.00857637
GSTA4	0.000377951	-0.471088	1	0.00857637
CCDC109B	0.000377951	0.471088	1	0.00857637
IRF4	0.000378761	-0.466371	1	0.00857637
PBX3	0.000378867	0.471012	1	0.00857637
PLEKHG5	0.000378867	0.471012	1	0.00857637
SPEG	0.000378867	0.471012	1	0.00857637
RFFL	0.000379786	0.470936	1	0.00857752
ZNF24	0.000379786	-0.470936	1	0.00857752
CCL17	0.000381258	-0.466171	1	0.00859094
PROS1	0.000381629	-0.470783	1	0.00859094
BCAS1	0.000382178	-0.466097	1	0.00859094
SLC25A33	0.000382554	-0.470707	1	0.00859094
SERPINE1	0.000382554	0.470707	1	0.00859094
CYSTM1	0.00038534	-0.470478	1	0.00864369
CKMT1A	0.000386852	-0.465727	1	0.00866591
AFAP1	0.000387208	0.470326	1	0.00866591
GPD1L	0.000388145	-0.47025	1	0.00866725
SNX32	0.000388145	-0.47025	1	0.00866725
NAV3	0.000390025	0.470097	1	0.00869327
DDX25	0.00039019	-0.465465	1	0.00869327
NME7	0.000394762	0.469716	1	0.00878523
AKR1B15	0.000395823	0.465027	1	0.00879894
TAB2	0.000399551	0.469335	1	0.00887183
GK	0.000400515	-0.469259	1	0.00888326
CPVL	0.000405368	-0.468877	1	0.00898081
PSORS1C1	0.000405832	0.464263	1	0.00898102
CSRNP1	0.000406345	0.468801	1	0.00898231
DEFB126	0.000406884	-0.464183	1	0.00898418
FXYD3	0.000408305	-0.468649	1	0.0090055
PPP2R1B	0.000410274	0.468496	1	0.00903883
CHCHD10	0.000411262	-0.46842	1	0.0090505
SLCO5A1	0.000412244	-0.463782	1	0.00905213
BCAP29	0.000412251	-0.468344	1	0.00905213
FAM161A	0.000413243	-0.468268	1	0.00905379
RTN4	0.000413243	0.468268	1	0.00905379
MYH10	0.000415234	-0.468115	1	0.00908733
ACKR3	0.000417345	0.463404	1	0.00912343
CCDC43	0.000419241	-0.46781	1	0.00915475
C14orf1	0.000421258	-0.467658	1	0.0091785
MED29	0.000421258	0.467658	1	0.0091785
FLVCR2	0.000423284	-0.467505	1	0.00921248
BAHCC1	0.000426339	-0.467277	1	0.00925858
GGA2	0.000426339	-0.467277	1	0.00925858
TMEM8A	0.000427362	-0.4672	1	0.00926189
IL12RB2	0.000427428	-0.46267	1	0.00926189
RAB11FIP5	0.000428387	0.467124	1	0.00927248
MIIP	0.000429414	-0.467048	1	0.00928455
PSEN2	0.000431475	-0.466895	1	0.00930875
TSPAN10	0.000431475	-0.466895	1	0.00930875
PKNOX2	0.000432509	-0.466819	1	0.00932088
TMEM120A	0.000433545	-0.466743	1	0.00933304
BTBD2	0.000434584	0.466667	1	0.00933505
NTN4	0.000434584	0.466667	1	0.00933505
IFITM1	0.000436969	0.46199	1	0.00937609
SGCD	0.000438093	-0.461911	1	0.00939001
PTCD3	0.000438761	-0.466362	1	0.00939414
ITLN2	0.000439367	-0.461821	1	0.00939694
FADS3	0.000440863	0.466209	1	0.00941591
BMP2	0.000441207	0.461692	1	0.00941591
LAMB3	0.000445094	0.465904	1	0.00946028
TRMT2A	0.000445094	-0.465904	1	0.00946028
CYR61	0.000446158	0.465828	1	0.00946028
EEPD1	0.000446158	-0.465828	1	0.00946028
GDPD5	0.000446158	-0.465828	1	0.00946028
HIRA	0.000446158	-0.465828	1	0.00946028
C10orf55	0.000450866	0.461023	1	0.00953766
APBB1IP	0.000451516	0.460978	1	0.00953766
RELA	0.000452589	0.465371	1	0.00953766
RIPK4	0.000452589	-0.465371	1	0.00953766
NXPE2	0.000453603	0.460836	1	0.00953766
VEZT	0.000453669	0.465294	1	0.00953766
BCAN	0.000453669	-0.465294	1	0.00953766
INPP4B	0.000453669	-0.465294	1	0.00953766
SLC16A10	0.000455836	-0.465142	1	0.00957303
ISLR	0.00045695	0.460608	1	0.00958626
OTUD7B	0.000459104	-0.464913	1	0.00960529
PPP1R37	0.000459104	-0.464913	1	0.00960529
GNG8	0.000459316	-0.460448	1	0.00960529
OMA1	0.000462393	-0.464685	1	0.00965942
FNTB	0.000463494	-0.464608	1	0.0096722
S100A16	0.000465704	0.464456	1	0.00970805
FKBP6	0.000467531	-0.459898	1	0.00973587
NEGR1	0.000468395	0.459841	1	0.0097436
GREB1	0.000469036	-0.464227	1	0.00974667
NTNG1	0.000471261	0.459651	1	0.0097678
SLC16A2	0.000472216	0.459588	1	0.0097678
ONECUT2	0.00047239	-0.463998	1	0.0097678
PCDHGA11	0.000472943	0.45954	1	0.0097678
ARL4C	0.000473513	0.463922	1	0.0097678
CCDC64	0.000473513	-0.463922	1	0.0097678
PTP4A1	0.000473513	-0.463922	1	0.0097678
MELK	0.000474638	0.463846	1	0.0097752
PHYHIPL	0.00047486	-0.459415	1	0.0097752
PRKD3	0.000475765	-0.46377	1	0.00978364
ELOVL4	0.000477496	0.459243	1	0.00979957
CLYBL	0.000478028	-0.463617	1	0.00979957
FAM134B	0.000478028	-0.463617	1	0.00979957
CASC4	0.000479163	0.463541	1	0.00981266
ZSWIM4	0.00048144	0.463389	1	0.00984909
CLDN12	0.000482583	-0.463312	1	0.00986225
CCBE1	0.000489024	0.4585	1	0.00998356
NDUFA6	0.000492975	-0.462626	1	0.0100435
OXTR	0.000492975	0.462626	1	0.0100435
SLC15A3	0.00049547	0.458091	1	0.0100839
MLH3	0.000496484	-0.462398	1	0.0100942
ENG	0.000502383	0.462016	1	0.0102036
CIB2	0.000503571	-0.46194	1	0.0102172
ARNTL2	0.00050476	0.461864	1	0.0102308
PIK3R3	0.000505953	-0.461788	1	0.0102445
NMNAT2	0.000508346	0.461635	1	0.0102824
B2M	0.000510749	0.461483	1	0.0103205
PKLR	0.000513634	-0.456965	1	0.0103682
SLC25A1	0.000516801	-0.461102	1	0.0104108
TPM1	0.000516801	0.461102	1	0.0104108
TSPAN32	0.00051811	0.456693	1	0.0104266
RAET1G	0.00051913	0.456632	1	0.0104365
CACNB4	0.000520279	-0.456562	1	0.010442
MCAT	0.000520464	-0.460873	1	0.010442
SNCAIP	0.000521243	0.456504	1	0.0104454
GINM1	0.00052169	0.460797	1	0.0104454
UBE2L6	0.00052415	0.460644	1	0.0104841
RIPK2	0.000526621	0.460492	1	0.0105228
MBOAT7	0.000527861	0.460415	1	0.0105369
WNT7B	0.000532361	0.455842	1	0.0106161
VAT1	0.00053661	-0.459882	1	0.01069
CTNNB1	0.0005404	-0.459653	1	0.0107547
DGKD	0.000541669	0.459577	1	0.0107583
RAB7A	0.000541669	-0.459577	1	0.0107583
NCKAP5L	0.00054294	-0.459501	1	0.0107727
DYNC1I1	0.000544215	-0.459424	1	0.0107871
ATP4A	0.000545567	-0.45507	1	0.0108031
CTGF	0.000546771	0.459272	1	0.0108161
RELB	0.000548053	0.459196	1	0.0108306
TMEM145	0.000550569	-0.454783	1	0.0108598
MAP3K7	0.000550626	0.459043	1	0.0108598
PRKAR1A	0.000554506	-0.458815	1	0.0109183
CACNA2D3	0.000554755	0.454544	1	0.0109183
IL1B	0.000555805	0.458738	1	0.0109183
TGFBR3	0.000555805	-0.458738	1	0.0109183
DNASE2B	0.000557308	-0.454399	1	0.010937
FLI1	0.000562466	0.454108	1	0.0110272
NMU	0.000566925	0.453858	1	0.0111036
IFI44	0.000570274	0.4579	1	0.0111582
OLFML1	0.000575416	-0.453388	1	0.0112453
ADGRF1	0.000575863	0.453363	1	0.0112453
TRIM58	0.000578598	0.453213	1	0.0112875
DPF3	0.000579237	0.453178	1	0.0112888
DRAM1	0.000582367	0.457214	1	0.0113205
TMEM144	0.000582664	-0.452991	1	0.0113205
FOXA1	0.000583338	0.452955	1	0.0113205
ZFP36	0.000583725	0.457137	1	0.0113205
CTSA	0.000583725	-0.457137	1	0.0113205
HTR3B	0.000584527	-0.45289	1	0.0113249
DNAH11	0.000585446	0.45284	1	0.0113316
SH3BP1	0.000586449	-0.456985	1	0.0113399
CXorf65	0.000589735	-0.452609	1	0.0113923
C14orf37	0.000591932	-0.45668	1	0.0114236
CDA	0.000592939	0.452437	1	0.0114319
MRPL35	0.000594691	-0.456528	1	0.0114465
PKIA	0.000594944	0.452329	1	0.0114465
GZMB	0.000595438	-0.452303	1	0.0114465
SCARA3	0.00059638	0.452253	1	0.0114535
NPBWR1	0.000602281	0.45194	1	0.0115481
SCAMP5	0.000603038	-0.45607	1	0.0115481
HAS1	0.000603059	0.451899	1	0.0115481
DIP2B	0.000608662	-0.455765	1	0.0116441
RTFDC1	0.000610076	-0.455689	1	0.0116599
VARS2	0.000612911	-0.455536	1	0.0117028
KIF3A	0.000614333	-0.45546	1	0.0117186
CHMP5	0.000617187	0.455308	1	0.0117533
ETNPPL	0.000617342	-0.451153	1	0.0117533
IL18R1	0.000622299	0.450898	1	0.0118142
CITED1	0.00062293	-0.455003	1	0.0118142
UNK	0.00062293	-0.455003	1	0.0118142
ZNF362	0.00062293	-0.455003	1	0.0118142
PLP1	0.000624374	-0.454927	1	0.0118302
C9orf69	0.00062582	0.45485	1	0.0118349
KLHDC8B	0.00062582	-0.45485	1	0.0118349
VPS13B	0.000627269	0.454774	1	0.0118462
RDH8	0.000627617	-0.450626	1	0.0118462
HSDL1	0.000628722	-0.454698	1	0.0118557
P2RX4	0.000634562	-0.454393	1	0.0119431
POLR3K	0.000634562	-0.454393	1	0.0119431
PVRL3	0.00063603	0.454317	1	0.0119479
CRYL1	0.00063603	-0.454317	1	0.0119479
COL11A2	0.000638975	-0.454164	1	0.0119919
IL19	0.00064343	-0.449831	1	0.012064
SLFN12	0.000648092	0.4496	1	0.0121399
PROSER3	0.000649379	0.453631	1	0.0121525
FMO4	0.000650878	-0.453554	1	0.012169
TNRC18	0.00065238	0.453478	1	0.0121856
MRPS25	0.000653885	-0.453402	1	0.0122021
KIAA0226L	0.0006584	-0.449094	1	0.0122572
LEPR	0.000658419	0.453173	1	0.0122572
TMEM130	0.000659017	0.449064	1	0.0122572
DAW1	0.000659475	0.449042	1	0.0122572
OSBPL9	0.000659937	-0.453097	1	0.0122572
STX1A	0.000664509	0.452868	1	0.0123305
UBE2R2	0.000666039	0.452792	1	0.0123473
C5orf22	0.000667573	-0.452716	1	0.0123526
NDUFB5	0.000667573	-0.452716	1	0.0123526
C2orf83	0.000672784	-0.4484	1	0.0124374
CRELD2	0.000678398	-0.452182	1	0.0125061
DNAJA1	0.000678398	0.452182	1	0.0125061
TESK1	0.000678398	0.452182	1	0.0125061
SHC1	0.000679958	0.452106	1	0.0125231
IGF2BP3	0.00068152	0.45203	1	0.0125402
MPP4	0.000683086	0.451953	1	0.0125573
RIN1	0.000687803	0.451725	1	0.0126323
RXRG	0.000690777	-0.44755	1	0.0126663
TOR1A	0.000690965	0.451572	1	0.0126663
TLR4	0.00069207	0.44749	1	0.0126663
IFIT1	0.00069255	0.451496	1	0.0126663
KRTAP19.1	0.000693359	-0.44743	1	0.0126663
DCAF12	0.000694139	0.45142	1	0.0126663
IRAK1	0.000694139	0.45142	1	0.0126663
FCER1G	0.000697326	-0.451267	1	0.0127127
GPR176	0.000698925	0.451191	1	0.0127301
TJP2	0.000703741	0.450962	1	0.0127942
NEU1	0.000703741	-0.450962	1	0.0127942
SYBU	0.000705274	0.44688	1	0.0128103
KLHL14	0.000706414	-0.446828	1	0.0128192
TNFRSF14	0.000708588	-0.450734	1	0.0128469
C6orf62	0.00071021	0.450658	1	0.0128645
ITPRIP	0.000713464	0.450505	1	0.0129116
ANKS1B	0.000715096	-0.450429	1	0.0129234
ELMSAN1	0.000716732	0.450353	1	0.0129234
FBRS	0.000716732	0.450353	1	0.0129234
SLC27A3	0.000716732	-0.450353	1	0.0129234
CTTNBP2	0.000724961	-0.449971	1	0.0130599
FGFBP1	0.000727595	0.445872	1	0.0130954
MAGED4B	0.000729061	-0.445807	1	0.0131098
RNF125	0.000729939	-0.449743	1	0.0131137
MAFK	0.000731605	0.449666	1	0.0131317
SVEP1	0.000733223	0.445622	1	0.0131378
TMEM53	0.000733275	-0.44959	1	0.0131378
LRP2	0.00073409	-0.445584	1	0.0131405
STKLD1	0.000739988	-0.449285	1	0.0131871
ZNF41	0.000739988	0.449285	1	0.0131871
ZBTB2	0.000741675	0.449209	1	0.0131871
EDN2	0.0007422	0.445227	1	0.0131871
ANKRD31	0.00074335	-0.445177	1	0.0131871
BARD1	0.000743366	0.449133	1	0.0131871
CASP6	0.000743366	0.449133	1	0.0131871
PRR16	0.000743366	0.449133	1	0.0131871
ZNF48	0.000743366	0.449133	1	0.0131871
FAM188A	0.000743366	-0.449133	1	0.0131871
KIAA1324	0.000744513	0.445126	1	0.0131934
MFGE8	0.00074506	-0.449057	1	0.0131934
DKK1	0.000746845	0.445025	1	0.0132026
BFSP2	0.000746915	-0.445022	1	0.0132026
ZNF74	0.000750163	-0.448828	1	0.0132438
RP11.212D19.4	0.000750915	0.444848	1	0.0132438
RIN2	0.000751871	0.448752	1	0.0132438
PKIB	0.000751923	0.444805	1	0.0132438
HDDC2	0.000755298	-0.448599	1	0.0132914
ORC5	0.000757016	-0.448523	1	0.0132979
RC3H2	0.000757016	0.448523	1	0.0132979
ZBTB37	0.000758739	-0.448447	1	0.0133163
FMNL1	0.000762193	0.448294	1	0.0133651
XYLB	0.000763926	-0.448218	1	0.0133784
H2AFX	0.000765663	0.448142	1	0.0133784
HES6	0.000765663	-0.448142	1	0.0133784
PES1	0.000765663	-0.448142	1	0.0133784
FAM117A	0.000769146	-0.447989	1	0.0134156
GPR158	0.000769146	-0.447989	1	0.0134156
COX5A	0.000772644	-0.447837	1	0.0134647
ARSJ	0.000776156	0.447684	1	0.013507
NRG1	0.000776438	0.44376	1	0.013507
EBF2	0.000777687	0.443708	1	0.0135168
CMC2	0.000779683	-0.447532	1	0.0135396
FARP2	0.000781451	-0.447456	1	0.0135535
SSTR1	0.000782508	0.443506	1	0.0135535
AP1S2	0.000783224	-0.447379	1	0.0135535
UHRF1	0.000783224	0.447379	1	0.0135535
SGCB	0.000785	0.447303	1	0.0135605
ETV5	0.000785	-0.447303	1	0.0135605
UBE2A	0.00079035	0.447075	1	0.0136291
USP48	0.00079035	-0.447075	1	0.0136291
ST6GALNAC1	0.000792041	-0.443111	1	0.0136361
PLEKHO2	0.00079214	-0.446998	1	0.0136361
DLGAP1	0.000794932	-0.442992	1	0.0136646
MLIP	0.000795178	-0.442982	1	0.0136646
NKD1	0.000802066	-0.442699	1	0.013771
SMDT1	0.000812081	-0.44616	1	0.0139114
KCNQ4	0.000812246	-0.442287	1	0.0139114
PPP1R1A	0.000812358	-0.442282	1	0.0139114
ARHGEF28	0.000813916	0.446083	1	0.0139261
DOCK2	0.000815755	0.446007	1	0.0139455
ARSG	0.000819444	-0.445855	1	0.0139964
SULT2B1	0.000820955	-0.441937	1	0.0140038
SLC25A23	0.000821294	-0.445779	1	0.0140038
SYNE2	0.000826867	-0.44555	1	0.0140867
SERTAD3	0.000828732	0.445474	1	0.0141063
FAM89B	0.000830602	0.445397	1	0.0141259
SPOCD1	0.000834351	0.445245	1	0.0141775
TMEM229B	0.000838116	-0.445092	1	0.0142293
AKR1C2	0.000838864	0.441229	1	0.0142297
ZC3H12D	0.000842454	0.441088	1	0.0142766
MAGED4	0.000843148	-0.441061	1	0.0142766
NLRP1	0.000843792	0.444864	1	0.0142766
RASD1	0.000847596	-0.444711	1	0.0143286
C11orf24	0.000851415	-0.444559	1	0.0143809
NYAP1	0.000854322	-0.440628	1	0.0144177
ST6GALNAC2	0.000857172	-0.44433	1	0.0144534
CCNB1IP1	0.000859099	-0.444254	1	0.0144736
TTK	0.00086103	0.444178	1	0.0144893
WBSCR28	0.000862441	0.440317	1	0.0144893
ELL2	0.000862965	0.444101	1	0.0144893
MTHFR	0.000862965	-0.444101	1	0.0144893
TRIM48	0.000866346	-0.440168	1	0.0145337
GPR19	0.000870744	-0.443796	1	0.0145831
SEZ6	0.000870765	-0.44	1	0.0145831
LAMTOR4	0.000872698	-0.44372	1	0.0145907
MTERF1	0.000872698	-0.44372	1	0.0145907
MARCKSL1	0.000876619	-0.443568	1	0.0146315
SFXN4	0.000876619	-0.443568	1	0.0146315
FAM26E	0.000877803	0.439734	1	0.0146389
ACVR2B	0.000878586	-0.443492	1	0.0146396
COLEC10	0.000881712	0.439588	1	0.0146793
MEF2C	0.00088253	-0.443339	1	0.0146806
GADD45B	0.000884509	0.443263	1	0.0147011
TMEM244	0.00088817	0.439347	1	0.0147496
CHST4	0.000890406	0.439264	1	0.0147629
SEPT3	0.000890468	-0.443034	1	0.0147629
ZNF138	0.000896464	-0.442805	1	0.0148499
SAMD3	0.000900615	0.438886	1	0.0149062
NFKB2	0.000902496	0.442577	1	0.0149248
AIFM3	0.000903521	-0.43878	1	0.0149293
SGCA	0.000908565	-0.442348	1	0.0149986
PNMA6A	0.000909785	-0.438551	1	0.0149986
MVD	0.000910596	-0.442272	1	0.0149986
CDH1	0.000910755	-0.438516	1	0.0149986
MREG	0.000912631	-0.442196	1	0.0150006
RALY	0.000912631	-0.442196	1	0.0150006
RHCG	0.000914095	-0.438394	1	0.0150006
SLC45A1	0.000914319	0.438386	1	0.0150006
LGALSL	0.00091467	-0.442119	1	0.0150006
SCN9A	0.000915592	0.43834	1	0.0150033
TMEM177	0.000918761	-0.441967	1	0.0150427
GNPDA1	0.000922869	-0.441814	1	0.0150975
RCN2	0.000924929	-0.441738	1	0.0151186
USP54	0.000929061	-0.441586	1	0.0151736
MTERF4	0.000931134	0.441509	1	0.0151949
TMEM251	0.00093321	-0.441433	1	0.0152163
PPM1H	0.000935291	-0.441357	1	0.0152251
ZER1	0.000935291	0.441357	1	0.0152251
CNTFR	0.000938685	-0.437513	1	0.0152677
AIM1	0.000939465	0.441204	1	0.0152679
UGT2B7	0.000941865	-0.437401	1	0.0152943
GM2A	0.000943656	-0.441052	1	0.0153108
ADCY7	0.000945758	0.440976	1	0.0153197
SRF	0.000945758	0.440976	1	0.0153197
STXBP1	0.000949974	-0.440823	1	0.0153754
RTN1	0.000958827	0.436807	1	0.015506
BIN1	0.00096701	0.440213	1	0.0155965
PPP1R13L	0.00096701	0.440213	1	0.0155965
STX4	0.00096701	0.440213	1	0.0155965
CAPSL	0.000967906	0.436493	1	0.0155965
KLF7	0.000969159	0.440137	1	0.0155965
GAS8	0.000969159	-0.440137	1	0.0155965
F2R	0.000971312	0.440061	1	0.0156184
TP63	0.000975665	0.436227	1	0.0156757
FBXO22	0.000979967	-0.439756	1	0.015732
PPARGC1B	0.000984321	-0.439604	1	0.0157891
CHCHD3	0.000988692	-0.439451	1	0.0157951
ECE1	0.000988692	0.439451	1	0.0157951
LRPAP1	0.000988692	-0.439451	1	0.0157951
NAGA	0.000988692	-0.439451	1	0.0157951
NARS2	0.000988692	-0.439451	1	0.0157951
INO80	0.000993081	0.439299	1	0.0158268
COA3	0.000993081	-0.439299	1	0.0158268
SNRNP25	0.000993081	-0.439299	1	0.0158268
ACTN2	0.00100183	-0.435343	1	0.015929
PPP1R7	0.00100191	0.438994	1	0.015929
SMARCC2	0.00100191	0.438994	1	0.015929
FGD6	0.00100413	0.438917	1	0.0159386
UBXN8	0.00100413	-0.438917	1	0.0159386
SPTLC1	0.00100635	0.438841	1	0.0159611
PTCD1	0.00101081	-0.438689	1	0.016019
MAP7D1	0.00101305	0.438613	1	0.016022
THAP9	0.00101305	-0.438613	1	0.016022
BEST3	0.00101372	0.434948	1	0.016022
EPPK1	0.00101425	0.43493	1	0.016022
SLC16A3	0.00101529	0.438536	1	0.0160257
HSF5	0.0010202	-0.434734	1	0.0160903
ZNF254	0.00102257	-0.434657	1	0.0161148
LANCL3	0.00102547	0.434561	1	0.0161477
CHD1	0.00102883	-0.438079	1	0.0161877
PPT2	0.00103794	-0.437774	1	0.016297
TLE6	0.00103794	-0.437774	1	0.016297
MMP3	0.00103825	0.434146	1	0.016297
MKNK2	0.00104483	0.437545	1	0.0163872
LYST	0.00104713	-0.437469	1	0.0163974
RBPMS2	0.00104713	-0.437469	1	0.0163974
PSMB10	0.00105176	0.437317	1	0.0164409
CCRL2	0.00105343	0.433658	1	0.0164409
ALG6	0.00105407	-0.43724	1	0.0164409
MCCC1	0.00105407	-0.43724	1	0.0164409
PPP3CA	0.00105407	0.43724	1	0.0164409
SOX15	0.00105872	0.437088	1	0.0164874
TAPBP	0.00105872	0.437088	1	0.0164874
NUDT12	0.00106339	-0.436935	1	0.0165471
SAMSN1	0.00106506	0.433289	1	0.0165574
MYO1C	0.00106573	0.436859	1	0.0165574
KPNA7	0.00106744	0.433214	1	0.0165709
KIF4A	0.00107514	0.436554	1	0.0166774
TRAF3IP1	0.00107751	0.436478	1	0.0166879
RAB27A	0.00107751	-0.436478	1	0.0166879
THG1L	0.00107988	0.436402	1	0.0167115
TTLL4	0.0010894	-0.436097	1	0.0168383
TRIM16L	0.00109419	0.435944	1	0.0168383
GDA	0.00109425	0.432377	1	0.0168383
MPPED2	0.00109464	-0.432366	1	0.0168383
TMC3	0.00109464	-0.432366	1	0.0168383
ITGA11	0.00109659	0.435868	1	0.0168383
UBTD2	0.00109659	0.435868	1	0.0168383
ACSBG1	0.00109659	-0.435868	1	0.0168383
AHCY	0.00109659	-0.435868	1	0.0168383
MRPL44	0.00109659	-0.435868	1	0.0168383
ZNF597	0.001099	0.435792	1	0.0168557
SLCO1C1	0.00109944	-0.432218	1	0.0168557
PCED1B	0.00110267	0.432119	1	0.0168838
KDM2A	0.00110383	0.435639	1	0.0168838
TANGO2	0.00110383	-0.435639	1	0.0168838
GPR143	0.00110862	-0.431937	1	0.016944
MT.CO2	0.00111598	-0.435258	1	0.0170307
CYP7A1	0.00111602	-0.431712	1	0.0170307
FSTL4	0.00111905	-0.43162	1	0.0170578
DLK2	0.00112088	0.435106	1	0.0170578
VASP	0.00112088	0.435106	1	0.0170578
ANK1	0.00112124	0.431554	1	0.0170578
VNN1	0.00112351	0.431485	1	0.0170791
BEND6	0.00112579	0.434953	1	0.0171006
RNF144A	0.00112826	-0.434877	1	0.0171229
RASA1	0.00113073	0.434801	1	0.0171229
TCF3	0.00113073	0.434801	1	0.0171229
TRAF5	0.00113073	-0.434801	1	0.0171229
OR2W3	0.00113179	0.431237	1	0.0171259
FAM78A	0.00113568	-0.434648	1	0.0171716
SLC45A2	0.00113899	-0.431022	1	0.0172073
FGD4	0.00114065	-0.434496	1	0.0172073
PDGFB	0.00114065	0.434496	1	0.0172073
IFIH1	0.00114315	0.43442	1	0.0172186
CERK	0.00114315	-0.43442	1	0.0172186
HRASLS5	0.00114459	-0.430856	1	0.0172272
COMMD4	0.00114564	-0.434343	1	0.01723
CTSH	0.00115317	-0.434115	1	0.01733
UBE2G1	0.00115569	0.434038	1	0.0173547
MOB1B	0.00115821	-0.433962	1	0.0173793
HERC1	0.00116327	-0.43381	1	0.0174288
XPNPEP3	0.00116327	-0.43381	1	0.0174288
ALPP	0.00116964	0.430121	1	0.0175109
CLU	0.00117602	0.433429	1	0.0175798
TBPL1	0.00117602	0.433429	1	0.0175798
TFF3	0.00117877	-0.429857	1	0.0176075
KCNN4	0.00118115	0.433276	1	0.0176298
KREMEN2	0.00118372	-0.4332	1	0.0176549
MDGA2	0.00118596	-0.42965	1	0.0176749
TFEC	0.00119475	0.429398	1	0.0177924
RAB3C	0.00119582	-0.429368	1	0.0177942
VHL	0.00119667	0.432819	1	0.0177942
MAP2K4	0.00119927	0.432743	1	0.0178195
NAP1L2	0.00120249	0.429178	1	0.0178454
TXK	0.0012042	0.42913	1	0.0178454
DCBLD2	0.00120449	0.43259	1	0.0178454
TTC6	0.00120462	0.429118	1	0.0178454
EFHD1	0.00121008	-0.428964	1	0.0179129
AL008723.1	0.00121965	-0.428695	1	0.0180409
KMT2A	0.00122294	0.432056	1	0.018076
L3HYPDH	0.00123092	0.431828	1	0.0181655
MKX	0.00123144	0.428366	1	0.0181655
PLCL1	0.0012319	-0.428354	1	0.0181655
CHCHD6	0.00123359	-0.431751	1	0.0181655
NPAS1	0.00123359	-0.431751	1	0.0181655
FAM124A	0.00123626	-0.431675	1	0.0181914
PXMP4	0.00124972	-0.431294	1	0.0183758
DBNDD1	0.00125514	-0.431142	1	0.0184418
ATG16L1	0.00126059	0.430989	1	0.0185079
MIPEP	0.00126605	-0.430837	1	0.0185744
TTC28	0.00127704	-0.430532	1	0.0187217
RTN4R	0.0012798	-0.430455	1	0.0187439
IGDCC4	0.00128045	-0.42703	1	0.0187439
PFKM	0.00128257	-0.430379	1	0.018761
ROM1	0.00128534	0.430303	1	0.0187876
DHODH	0.0012909	-0.430151	1	0.0188549
TGOLN2	0.00129648	0.429998	1	0.0189225
PRKCD	0.00130489	-0.429769	1	0.0190196
COL8A1	0.00130525	0.426371	1	0.0190196
GOLGA7B	0.00130771	-0.429693	1	0.0190196
SLC30A6	0.00130771	0.429693	1	0.0190196
RAMP1	0.00130794	0.4263	1	0.0190196
ARHGDIG	0.00131086	-0.426224	1	0.0190479
HLA.DOB	0.00132918	0.425746	1	0.0192999
PLBD1	0.001331	-0.425699	1	0.0193106
TMEM257	0.00133187	-0.425677	1	0.0193106
CSNK1A1	0.00133616	0.428931	1	0.0193303
MED15	0.00133616	-0.428931	1	0.0193303
ST7	0.00133616	-0.428931	1	0.0193303
NTNG2	0.0013404	0.425456	1	0.0193687
PARM1	0.00134077	0.425447	1	0.0193687
YPEL5	0.00134191	0.428778	1	0.019371
COL6A3	0.00134337	0.42538	1	0.0193779
ANKRD9	0.0013448	-0.428702	1	0.0193844
KAZN	0.0013458	-0.425318	1	0.0193847
TBX3	0.00135059	0.42855	1	0.0194395
CALCOCO1	0.0013535	0.428473	1	0.0194529
MTCL1	0.0013535	0.428473	1	0.0194529
TSPYL4	0.00135932	0.428321	1	0.0195224
SLC8B1	0.00136517	0.428168	1	0.0195922
PI4KA	0.0013681	-0.428092	1	0.01962
FCF1	0.00137103	0.428016	1	0.0196479
ZMIZ2	0.00137398	0.42794	1	0.0196758
ID1	0.00137693	0.427864	1	0.0197037
RTKN	0.00137988	-0.427787	1	0.0197317
KCNIP2	0.00138284	-0.427711	1	0.0197597
FABP3	0.00138878	-0.427559	1	0.0198159
FAM122B	0.00138878	0.427559	1	0.0198159
SAT1	0.00139176	-0.427482	1	0.0198441
NIT2	0.00139773	-0.42733	1	0.0199148
PLOD3	0.00140072	-0.427254	1	0.0199431
PLCZ1	0.00140432	0.423847	1	0.0199766
ENHO	0.00140509	-0.423828	1	0.0199766
INHBA	0.00141276	0.426949	1	0.0200711
NME5	0.00141806	-0.423509	1	0.0201319
TRIM14	0.00142185	0.42672	1	0.0201568
DNAAF1	0.00142185	-0.42672	1	0.0201568
LYSMD4	0.00142518	-0.423336	1	0.0201895
PIP5KL1	0.00142793	0.426568	1	0.0202141
BLOC1S6	0.00143099	-0.426491	1	0.0202283
WIPI1	0.00143099	-0.426491	1	0.0202283
BACE2	0.00143711	-0.426339	1	0.0202858
ZBTB10	0.00143711	-0.426339	1	0.0202858
ZNF219	0.00144326	-0.426186	1	0.0203511
IFNL1	0.0014438	0.422885	1	0.0203511
SLCO2A1	0.00144485	0.42286	1	0.0203515
PSMB6	0.00144634	0.42611	1	0.0203579
SCNN1A	0.0014542	0.422636	1	0.020454
RUNX1	0.00145562	0.425881	1	0.0204594
APCDD1	0.0014632	-0.422421	1	0.0205468
EHBP1L1	0.00146495	0.425653	1	0.0205468
HS1BP3	0.00146495	-0.425653	1	0.0205468
IL4R	0.00147121	0.4255	1	0.0206053
WHSC1	0.00147121	0.4255	1	0.0206053
DNAI1	0.00147256	-0.422199	1	0.0206096
VAMP7	0.00147434	0.425424	1	0.0206199
HSPBAP1	0.00147749	-0.425348	1	0.0206201
SDHC	0.00147749	-0.425348	1	0.0206201
SLC26A4	0.00147749	-0.425348	1	0.0206201
TIGD4	0.00148063	-0.425272	1	0.0206494
NCOR2	0.00148379	0.425195	1	0.0206788
HEY1	0.00149011	-0.425043	1	0.0207377
SOCS3	0.00149011	0.425043	1	0.0207377
GANC	0.00149328	-0.424967	1	0.0207673
ITGB1	0.00149646	0.42489	1	0.0207968
RIMS4	0.00150305	-0.421485	1	0.0208737
CACNG7	0.00150859	0.421356	1	0.0209359
CGB8	0.00151389	0.421234	1	0.0209947
MLK4	0.00151592	0.421187	1	0.0210082
ANKFY1	0.0015221	0.424281	1	0.0210643
SYDE1	0.0015221	0.424281	1	0.0210643
C1orf61	0.00153027	-0.420858	1	0.0211625
HTR1D	0.00153561	0.420736	1	0.0212214
CTSS	0.00153833	0.423899	1	0.0212294
FBXO21	0.00153833	0.423899	1	0.0212294
SLC18B1	0.00154159	-0.423823	1	0.0212596
FAT2	0.00155041	-0.420401	1	0.0213504
NEURL2	0.00155142	-0.423594	1	0.0213504
SHC4	0.00155142	-0.423594	1	0.0213504
FERMT1	0.00155792	0.420231	1	0.0214072
PRKCDBP	0.00155801	0.423442	1	0.0214072
PRKCG	0.0015588	0.420212	1	0.0214072
KIAA0368	0.00156131	0.423366	1	0.0214268
GABRE	0.00156332	0.42011	1	0.0214276
CYP27A1	0.00156462	-0.423289	1	0.0214276
NLGN2	0.00156462	0.423289	1	0.0214276
TMEM237	0.00156793	0.423213	1	0.0214581
SMCO3	0.00157404	-0.419871	1	0.0214747
ABHD6	0.00157458	-0.423061	1	0.0214747
PPARGC1A	0.00157458	-0.423061	1	0.0214747
TRIM33	0.00157458	-0.423061	1	0.0214747
VWA7	0.00157458	0.423061	1	0.0214747
SNAPC1	0.00158125	0.422908	1	0.0215508
ARAP3	0.00158795	0.422756	1	0.0216272
TMEM151A	0.00159566	-0.419392	1	0.021715
C2CD4D	0.0015966	-0.419371	1	0.021715
ACO2	0.00160142	-0.422451	1	0.0217656
ITPR3	0.0016048	0.422375	1	0.0217817
SLC6A6	0.0016048	0.422375	1	0.0217817
TKTL1	0.00161856	-0.418891	1	0.0219373
VANGL2	0.00162103	-0.418838	1	0.0219373
ADRA1B	0.00162129	0.418832	1	0.0219373
ADAM17	0.00162182	0.421994	1	0.0219373
PDIA5	0.00162182	-0.421994	1	0.0219373
CCDC85A	0.00163109	0.41862	1	0.0220476
LMNB2	0.00163899	0.421612	1	0.0221289
SH2D3C	0.00163934	-0.418442	1	0.0221289
TNFSF10	0.00164488	0.418324	1	0.0221885
FBXO16	0.00165285	-0.421307	1	0.0222808
PPM1K	0.00165633	-0.421231	1	0.0223125
OXNAD1	0.00165982	-0.421155	1	0.0223291
KIF20A	0.00165982	0.421155	1	0.0223291
SMG6	0.00166332	0.421079	1	0.0223609
TANK	0.00166682	0.421002	1	0.0223927
MYO1D	0.00167033	-0.420926	1	0.0224246
IDH2	0.00167384	-0.42085	1	0.0224513
TMC8	0.00167723	-0.417637	1	0.0224513
APBB2	0.00167736	0.420774	1	0.0224513
NCKAP5	0.00167736	-0.420774	1	0.0224513
CD244	0.001678	-0.417621	1	0.0224513
KLHL2	0.00168089	0.420698	1	0.0224748
AMBN	0.00168208	-0.417535	1	0.0224756
FBXO5	0.00168442	0.420621	1	0.0224764
GDPD1	0.00168442	-0.420621	1	0.0224764
PTPRF	0.00168796	0.420545	1	0.0225084
SLC25A36	0.00169151	-0.420469	1	0.0225405
NAT8	0.00169828	-0.417196	1	0.0225897
DAP	0.00169863	0.420316	1	0.0225897
TWSG1	0.00169863	0.420316	1	0.0225897
CITED2	0.00170219	0.42024	1	0.0226067
DIAPH1	0.00170219	0.42024	1	0.0226067
CSF2	0.0017146	0.416858	1	0.0227562
VGLL2	0.00171947	0.416758	1	0.022799
CTC1	0.00172013	0.419859	1	0.022799
HSD17B14	0.00173098	-0.41963	1	0.0229273
DLG4	0.0017346	0.419554	1	0.02296
DFNB31	0.00173824	-0.419478	1	0.0229927
RANBP6	0.00174188	0.419402	1	0.0230255
SIGLEC15	0.00174553	0.419325	1	0.0230429
UNC80	0.00174553	-0.419325	1	0.0230429
TNFRSF21	0.00174919	0.419249	1	0.0230757
ADAMTS12	0.00175432	0.416047	1	0.023128
TPST2	0.00176019	-0.41902	1	0.02319
PAPPA2	0.00176242	0.415883	1	0.0231921
TBP	0.00176388	0.418944	1	0.0231921
MSRB2	0.00176388	-0.418944	1	0.0231921
AFP	0.00176861	0.415759	1	0.0232171
SLC44A5	0.00176976	0.415736	1	0.0232171
TGM2	0.00177127	0.418792	1	0.0232171
TTLL1	0.00177127	-0.418792	1	0.0232171
ST6GALNAC3	0.00177165	-0.415698	1	0.0232171
FAM89A	0.0017824	-0.418563	1	0.0233425
DDX6	0.00178612	0.418487	1	0.0233757
NME1	0.00179359	-0.418334	1	0.023458
WFDC10B	0.00180033	0.415127	1	0.0235159
UBE2O	0.00180109	-0.418182	1	0.0235159
PAWR	0.00180159	0.415102	1	0.0235159
NT5C2	0.00180485	0.418106	1	0.0235429
CPSF7	0.00180862	0.418029	1	0.0235765
DNAJC3	0.00181239	-0.417953	1	0.0236101
GRB10	0.00182376	-0.417724	1	0.0237269
MSL3	0.00182376	0.417724	1	0.0237269
GPN1	0.00182756	0.417648	1	0.0237607
RAB15	0.00183519	-0.417496	1	0.0238442
SNCB	0.00183854	-0.414379	1	0.0238721
PPP1R16B	0.00184538	-0.414247	1	0.0239451
ULK1	0.00184668	0.417267	1	0.0239462
DUSP4	0.00185052	-0.417191	1	0.0239804
BBS10	0.00185824	0.417038	1	0.0240645
POMGNT1	0.0018621	-0.416962	1	0.0240988
GBP4	0.00186404	0.413888	1	0.0241081
ACO1	0.00186598	0.416886	1	0.0241173
TAF1C	0.00186986	-0.41681	1	0.0241517
MMP8	0.00187375	-0.416733	1	0.0241861
C6orf141	0.00187567	0.413666	1	0.0241952
COL14A1	0.00188058	-0.413572	1	0.0242427
SENP1	0.00189723	0.416276	1	0.0244254
GBAS	0.00189723	-0.416276	1	0.0244254
ALDH3B1	0.00190117	0.4162	1	0.0244443
CCDC102B	0.00190117	0.4162	1	0.0244443
PPFIA3	0.00190511	-0.416123	1	0.0244498
BDNF	0.00190528	0.413106	1	0.0244498
HRCT1	0.00190531	0.413105	1	0.0244498
SEPT2	0.001917	0.415895	1	0.0245769
SLC27A6	0.0019177	0.412873	1	0.0245769
TRIM16	0.00192097	0.415819	1	0.0246029
PICK1	0.00192496	-0.415742	1	0.024638
CECR2	0.00192694	-0.412701	1	0.0246474
C11orf21	0.00193918	0.412474	1	0.0247879
EIF2AK2	0.00194901	0.415285	1	0.0248975
TBC1D2	0.00195305	0.415209	1	0.0249329
CTSV	0.00195709	-0.415132	1	0.0249363
SDCBP	0.00195709	-0.415132	1	0.0249363
LSP1	0.0019571	0.412144	1	0.0249363
ESF1	0.0019856	-0.414599	1	0.0252832
RSBN1L	0.0019897	-0.414523	1	0.0253191
SH2B2	0.00199793	-0.41437	1	0.0254074
UNC93B1	0.00200619	0.414218	1	0.0254797
MKKS	0.00200619	-0.414218	1	0.0254797
TUBG1	0.00201033	-0.414141	1	0.0254995
CRISPLD2	0.00201033	0.414141	1	0.0254995
OTUD4	0.00201864	0.413989	1	0.025572
LZTS1	0.00201864	-0.413989	1	0.025572
OGFRL1	0.0020228	0.413913	1	0.025592
C9orf91	0.0020228	-0.413913	1	0.025592
PML	0.00203116	0.41376	1	0.0256812
XRCC6	0.00203534	-0.413684	1	0.0257177
LUM	0.00203918	-0.410666	1	0.0257497
ERLIN1	0.00204374	0.413532	1	0.0257744
NMT2	0.00204374	0.413532	1	0.0257744
NSUN4	0.00204795	-0.413455	1	0.0257945
QPCTL	0.00204795	-0.413455	1	0.0257945
RAP1GAP	0.00205217	-0.413379	1	0.0258312
LURAP1	0.00205371	-0.41041	1	0.0258341
SMAD7	0.0020564	0.413303	1	0.0258515
RTCB	0.00206063	-0.413227	1	0.0258882
SORBS1	0.00206487	-0.41315	1	0.025925
LY6K	0.00206861	0.410149	1	0.025929
DNAJC1	0.00206912	-0.413074	1	0.025929
POLE3	0.00206912	0.413074	1	0.025929
FAXC	0.00207338	-0.412998	1	0.0259658
RAB23	0.00207764	0.412922	1	0.0260028
ESPN	0.00208192	-0.412845	1	0.0260398
NDUFS3	0.0020862	-0.412769	1	0.0260603
KIAA1217	0.0020862	0.412769	1	0.0260603
SAP30L	0.00209049	0.412693	1	0.0260974
CDH2	0.0021034	0.412464	1	0.0262255
MED30	0.0021034	0.412464	1	0.0262255
SP1	0.00211638	0.412236	1	0.0263707
GCK	0.00211985	0.409264	1	0.0263972
KCNJ6	0.00212591	0.409161	1	0.0264561
PTPN21	0.00213381	0.411931	1	0.0265376
EHD2	0.00214257	0.411778	1	0.0266131
UTRN	0.00214257	0.411778	1	0.0266131
CLCN7	0.00214696	-0.411702	1	0.0266342
SLAIN2	0.00214696	0.411702	1	0.0266342
CDK18	0.00215136	-0.411626	1	0.026672
PDHA1	0.00215577	-0.411549	1	0.0266932
SEMA4G	0.00215577	-0.411549	1	0.0266932
HRNR	0.00216172	-0.408555	1	0.0267501
C15orf65	0.00216461	0.411397	1	0.0267524
HELZ2	0.00216461	0.411397	1	0.0267524
CLIC1	0.00217793	0.411168	1	0.0268834
HMGN4	0.00217793	0.411168	1	0.0268834
SFI1	0.00218685	-0.411016	1	0.0269767
TMPRSS2	0.00219508	-0.407999	1	0.0270365
ENPP3	0.00219581	-0.410863	1	0.0270365
GNAI2	0.00219581	0.410863	1	0.0270365
CREBZF	0.0022003	0.410787	1	0.0270749
TGFBR2	0.0022093	0.410635	1	0.0271688
FAM65B	0.00221073	-0.407741	1	0.0271694
F3	0.00221382	0.410558	1	0.0271905
RTP3	0.0022226	0.407546	1	0.0272798
SPRR2D	0.00222385	-0.407525	1	0.0272798
TP53INP2	0.00222741	-0.41033	1	0.0273065
TLR6	0.00223196	0.410253	1	0.0273453
SNTA1	0.00224108	-0.410101	1	0.02744
CHN1	0.00224565	0.410025	1	0.027479
PRTG	0.00225023	-0.409949	1	0.027518
ABCC5	0.00225482	-0.409872	1	0.02754
SOX10	0.00225482	-0.409872	1	0.02754
CERS4	0.00226402	-0.40972	1	0.0276234
ATP5S	0.00226864	-0.409644	1	0.0276234
C3orf58	0.00226864	0.409644	1	0.0276234
L3MBTL2	0.00226864	-0.409644	1	0.0276234
VEGFB	0.00226864	-0.409644	1	0.0276234
PKD1	0.00227789	0.409491	1	0.027719
RGAG4	0.00228899	0.406473	1	0.027837
SLC5A11	0.00229553	0.406369	1	0.0278887
TMEM176B	0.0022962	-0.406358	1	0.0278887
PAQR9	0.00229748	-0.406338	1	0.0278887
FMNL3	0.00230585	0.409034	1	0.0279584
KRTAP4.8	0.00230605	0.406202	1	0.0279584
PERP	0.00231995	0.408805	1	0.0281096
MTF1	0.00232466	0.408729	1	0.0281495
SNX19	0.00233412	0.408576	1	0.0282294
RAB3IL1	0.00233412	-0.408576	1	0.0282294
SLC9A7	0.00233886	0.4085	1	0.028253
NETO1	0.00233893	0.405684	1	0.028253
FAM53C	0.00234361	0.408424	1	0.0282536
IFT88	0.00234361	-0.408424	1	0.0282536
NUAK1	0.00234361	0.408424	1	0.0282536
SEPT12	0.0023447	0.405594	1	0.0282536
CHADL	0.00234837	-0.408348	1	0.0282806
DUSP1	0.00235314	0.408271	1	0.0283036
VPS18	0.00235314	-0.408271	1	0.0283036
CDK7	0.00235792	0.408195	1	0.0283265
RANBP1	0.00235792	-0.408195	1	0.0283265
C22orf39	0.0023627	-0.408119	1	0.0283495
NFKBIZ	0.0023627	-0.408119	1	0.0283495
C4BPB	0.00236748	0.405239	1	0.0283554
CAMTA2	0.00236749	0.408043	1	0.0283554
CAMTA1	0.00236749	-0.408043	1	0.0283554
CIZ1	0.0023723	0.407966	1	0.0283957
SMTNL2	0.00238321	-0.404996	1	0.0285091
UBA6	0.00239159	0.407662	1	0.0285747
PPFIA1	0.00239159	-0.407662	1	0.0285747
ZNF804A	0.0023935	0.404838	1	0.0285802
OXLD1	0.00240129	-0.407509	1	0.028656
APLN	0.00240318	0.40469	1	0.0286613
DOCK3	0.00240615	0.407433	1	0.0286794
CFAP58	0.00240809	0.404615	1	0.0286852
ZMAT4	0.00241411	0.404524	1	0.0287395
PLEKHB1	0.00241591	-0.40728	1	0.0287436
CARD16	0.00242	0.404434	1	0.0287672
ZFP36L1	0.0024208	0.407204	1	0.0287672
AFAP1L1	0.0024306	-0.407052	1	0.0288663
RABGGTA	0.00243552	-0.406975	1	0.02889
SLC12A9	0.00243552	-0.406975	1	0.02889
LDB3	0.00245527	-0.40667	1	0.0291068
ASPSCR1	0.00246023	-0.406594	1	0.0291307
THSD4	0.00246023	0.406594	1	0.0291307
FGFR3	0.0024652	0.406518	1	0.0291546
NDUFAF5	0.0024652	-0.406518	1	0.0291546
RFX6	0.00247004	0.403681	1	0.0291611
TMEM158	0.00247018	0.406442	1	0.0291611
UAP1L1	0.00247018	-0.406442	1	0.0291611
NPY1R	0.00247354	0.403629	1	0.0291833
VPS39	0.00248017	0.406289	1	0.029244
CREB3L1	0.00248424	0.40347	1	0.0292681
STK11	0.00248517	0.406213	1	0.0292681
DCP2	0.00249019	-0.406137	1	0.0293097
ARHGAP35	0.00250024	0.405984	1	0.0293931
PCYT2	0.00250024	-0.405984	1	0.0293931
ANKRD34C	0.0025137	-0.403035	1	0.0295337
NAPEPLD	0.00251539	-0.405756	1	0.0295361
PRAME	0.00252046	-0.405679	1	0.029578
FKBP11	0.00252554	-0.405603	1	0.0296025
SHFM1	0.00252554	-0.405603	1	0.0296025
MYOC	0.00252795	-0.402827	1	0.0296132
C2orf88	0.00253063	-0.405527	1	0.0296209
NLRP3	0.00253161	0.402773	1	0.0296209
ABCG5	0.00254131	-0.402632	1	0.0297168
RAB1A	0.00255107	-0.405222	1	0.0298133
SPOCK3	0.00256252	0.402325	1	0.0299293
C16orf86	0.0025665	-0.404993	1	0.0299581
PIM1	0.00257166	0.404917	1	0.0300006
DHCR24	0.00257683	-0.404841	1	0.0300432
MAPT	0.00258719	-0.404688	1	0.0301433
STAT4	0.00258846	0.401952	1	0.0301433
CAMK2G	0.00259239	0.404612	1	0.0301535
BBS5	0.00259239	-0.404612	1	0.0301535
SPANXA2	0.00259963	0.401793	1	0.03022
SCIN	0.0026017	-0.401763	1	0.0302214
S100A1	0.00260282	-0.40446	1	0.0302214
CTC.454I21.3	0.00261313	-0.401601	1	0.0303073
SLC4A8	0.00261328	0.404307	1	0.0303073
DAB2	0.00261852	-0.404231	1	0.0303503
CYTH4	0.0026205	0.401496	1	0.0303554
MAFB	0.00262377	-0.404155	1	0.0303577
NFE2L3	0.00262377	0.404155	1	0.0303577
GSTM4	0.00262904	-0.404079	1	0.0303831
TOMM7	0.00262904	-0.404079	1	0.0303831
CCL2	0.00263737	0.401258	1	0.0304615
FBLN5	0.00264608	-0.401136	1	0.0305443
CUL5	0.00266082	0.403621	1	0.0306786
DUSP7	0.00266082	0.403621	1	0.0306786
ATP6V0A4	0.00266615	-0.403545	1	0.0307221
HOXC4	0.00267148	-0.403469	1	0.0307477
OPTN	0.00267148	0.403469	1	0.0307477
DMBT1	0.00268076	0.400652	1	0.0308365
RP11.108K14.8	0.00268583	0.400582	1	0.0308768
RNFT1	0.00268756	-0.40324	1	0.0308788
RNF157	0.00269294	-0.403164	1	0.0309226
AMTN	0.00269455	0.400462	1	0.0309231
HERC6	0.00270913	0.402935	1	0.0310544
SPOCK1	0.00270913	0.402935	1	0.0310544
PVRL1	0.0027254	0.402706	1	0.0312047
TMED3	0.0027254	-0.402706	1	0.0312047
FAHD2A	0.00273085	-0.40263	1	0.0312309
GJA3	0.00273085	-0.40263	1	0.0312309
SAMM50	0.0027363	-0.402554	1	0.0312752
IRF7	0.00274176	0.402478	1	0.0313014
SMG1	0.00274176	0.402478	1	0.0313014
RUNX1T1	0.00275112	0.399688	1	0.0313901
WBSCR22	0.00275272	-0.402325	1	0.0313902
MYEF2	0.00275822	-0.402249	1	0.0314262
AMIGO2	0.00275905	0.399581	1	0.0314262
TRIM2	0.00276372	-0.402173	1	0.0314612
DPYSL2	0.00278583	0.401868	1	0.0316764
SATB2	0.00278583	0.401868	1	0.0316764
FGFRL1	0.00279138	0.401791	1	0.0317213
MMP1	0.0028081	0.401563	1	0.0318746
KIAA1024	0.0028081	-0.401563	1	0.0318746
ETV4	0.0028249	-0.401334	1	0.0320469
TNFRSF17	0.00283247	0.3986	1	0.0320825
CUL4B	0.00283615	0.401182	1	0.0320825
PRKD2	0.00283615	0.401182	1	0.0320825
MTFR1L	0.00283615	-0.401182	1	0.0320825
SLC25A39	0.00283615	-0.401182	1	0.0320825
LGMN	0.0028418	-0.401105	1	0.0321245
NYAP2	0.00284312	0.398459	1	0.0321245
NUP88	0.00285311	0.400953	1	0.0322008
HAO1	0.00285313	0.398328	1	0.0322008
MT.ATP6	0.00285878	-0.400877	1	0.0322461
SMCHD1	0.00287015	0.400724	1	0.0323559
RSAD2	0.00287428	0.398051	1	0.0323833
COMT	0.00287585	-0.400648	1	0.0323833
ICOS	0.00288249	-0.397945	1	0.0324395
CRISPLD1	0.00288729	-0.400496	1	0.032475
BOLA3	0.00289302	-0.400419	1	0.032521
LRCH3	0.00289876	-0.400343	1	0.032567
SEC24B	0.00290451	0.400267	1	0.0326131
CSPG5	0.00291028	-0.400191	1	0.0326592
ELF4	0.00291605	0.400114	1	0.0327054
SMAD1	0.00292183	0.400038	1	0.0327331
TMEM260	0.00292183	-0.400038	1	0.0327331
OLA1	0.00292762	0.399962	1	0.0327609
GDAP1	0.00292762	-0.399962	1	0.0327609
CHPF2	0.00293343	0.399886	1	0.0327887
POLD4	0.00293343	0.399886	1	0.0327887
SEMA4F	0.00293924	-0.399809	1	0.0328351
AFMID	0.00294506	-0.399733	1	0.032863
SNX4	0.00294506	-0.399733	1	0.032863
DGKI	0.0029509	-0.399657	1	0.0328979
MYL10	0.00295152	-0.397056	1	0.0328979
HN1L	0.0029626	0.399504	1	0.0329871
KEL	0.00296286	-0.396912	1	0.0329871
C1orf115	0.00297191	-0.396798	1	0.0330692
DDO	0.00297755	0.396726	1	0.0331058
ITPKB	0.00298022	-0.399276	1	0.0331058
SLC33A1	0.00298022	-0.399276	1	0.0331058
FAM111A	0.00299202	0.399123	1	0.0331995
LAMP1	0.00299202	-0.399123	1	0.0331995
PERM1	0.00299794	0.399047	1	0.0332279
FAM81A	0.00299794	-0.399047	1	0.0332279
TNXB	0.00300315	0.396404	1	0.0332377
IZUMO4	0.00300387	0.398971	1	0.0332377
LRRN4CL	0.00300387	-0.398971	1	0.0332377
CXCL8	0.00302171	0.398742	1	0.0333977
DPH6	0.00302171	-0.398742	1	0.0333977
ABRA	0.00302913	0.39608	1	0.033461
CSNK1G2	0.00303965	0.398513	1	0.0335584
RPH3A	0.00305535	-0.395755	1	0.0337129
PIM3	0.00306371	-0.398209	1	0.0337863
GPR180	0.00306976	-0.398132	1	0.0338341
RSPO3	0.00307551	0.395506	1	0.0338544
CDC42EP4	0.00307581	0.398056	1	0.0338544
RPRM	0.00307674	0.395491	1	0.0338544
MCU	0.00308187	0.39798	1	0.0338732
ZCCHC9	0.00308187	-0.39798	1	0.0338732
GPR137B	0.00309403	-0.397827	1	0.0339879
C10orf10	0.00310624	0.397675	1	0.034103
XPO4	0.00311235	-0.397599	1	0.0341512
ATXN1	0.00311848	0.397522	1	0.0341805
RAB35	0.00311848	0.397522	1	0.0341805
EPHA3	0.00312843	-0.394862	1	0.0342705
BOD1	0.00313693	0.397294	1	0.0343256
NRIP1	0.00313693	0.397294	1	0.0343256
HOMER2	0.0031431	-0.397217	1	0.0343741
FRYL	0.00314928	0.397141	1	0.0344226
BAD	0.00315547	0.397065	1	0.0344712
ZNF326	0.00316789	-0.396913	1	0.0345878
COL7A1	0.00317412	0.396836	1	0.0346366
NIF3L1	0.00318035	0.39676	1	0.0346855
REEP6	0.0031866	-0.396684	1	0.0347229
CYP1B1	0.00318729	0.394156	1	0.0347229
B4GALNT2	0.00319048	0.394118	1	0.0347384
YPEL2	0.00319913	-0.396531	1	0.0348134
SMLR1	0.00320365	-0.393962	1	0.0348434
CDH23	0.00320541	-0.396455	1	0.0348434
NFIC	0.003218	0.396303	1	0.034961
KBTBD11	0.00322157	-0.39375	1	0.0349806
DPP7	0.00323063	-0.39615	1	0.0350597
FAM103A1	0.00323697	-0.396074	1	0.0351092
PPM1M	0.00324331	0.395998	1	0.0351249
TLDC1	0.00324331	0.395998	1	0.0351249
STRA6	0.00324375	0.393489	1	0.0351249
STAMBPL1	0.003247	0.393451	1	0.0351409
GORASP2	0.00324967	0.395921	1	0.0351505
LMNTD1	0.00325257	0.393386	1	0.0351627
GEM	0.00325604	0.395845	1	0.0351809
FAM47E	0.00326596	-0.39323	1	0.0352688
ZFPM2	0.00327644	0.393108	1	0.0353627
HMX3	0.00327903	0.393078	1	0.0353713
ANXA13	0.00328692	-0.392987	1	0.0354371
SLC26A11	0.00329448	-0.395388	1	0.0354838
GFRA1	0.00329485	0.392895	1	0.0354838
CENPM	0.00330092	-0.395312	1	0.0355299
TLL1	0.00330485	0.39278	1	0.0355503
CCDC51	0.00330738	-0.395235	1	0.0355503
UPK2	0.00330822	0.392741	1	0.0355503
FAXDC2	0.00331385	-0.395159	1	0.0355721
PDLIM3	0.00331385	-0.395159	1	0.0355721
SLC1A4	0.00332033	-0.395083	1	0.0355982
AREG	0.00332097	0.392595	1	0.0355982
LGI2	0.00332168	-0.392586	1	0.0355982
NWD1	0.00332458	0.392553	1	0.03561
CEP120	0.00332682	0.395007	1	0.0356146
GALNT12	0.00332936	-0.392498	1	0.0356225
CABLES1	0.00333332	-0.39493	1	0.0356263
IL1RAP	0.00333332	-0.39493	1	0.0356263
ATP5E	0.00334636	-0.394778	1	0.0357463
MAMDC2	0.00335018	-0.392261	1	0.0357678
CEACAM1	0.00335289	-0.394702	1	0.0357775
ATP8B3	0.00335944	0.394626	1	0.0358087
S100B	0.00335944	-0.394626	1	0.0358087
ARX	0.00336281	-0.392117	1	0.0358253
HLA.C	0.00337257	0.394473	1	0.0358712
PCSK6	0.00337257	-0.394473	1	0.0358712
RBM28	0.00337257	-0.394473	1	0.0358712
LRP10	0.00337915	0.394397	1	0.0359219
CERS2	0.00338574	0.394321	1	0.0359726
MROH9	0.00341714	-0.391505	1	0.0362856
TYRP1	0.00341888	-0.393939	1	0.0362856
MRPS5	0.00342554	-0.393863	1	0.0363368
DHRS11	0.00343221	-0.393787	1	0.0363881
OR2L13	0.00344542	0.39119	1	0.0364766
DDTL	0.00344559	-0.393634	1	0.0364766
BCL11B	0.00344854	0.391156	1	0.0364766
ONECUT1	0.00345216	-0.391115	1	0.0364766
USP6NL	0.0034523	-0.393558	1	0.0364766
ADGRE1	0.00345392	0.391096	1	0.0364766
MEX3D	0.00345902	0.393482	1	0.0364766
NAAA	0.00345902	0.393482	1	0.0364766
CBX8	0.00345902	-0.393482	1	0.0364766
SCARF2	0.00345902	-0.393482	1	0.0364766
CMPK2	0.00346151	0.391012	1	0.0364834
CACNG8	0.00347696	0.390841	1	0.0366118
NRP2	0.00347925	-0.393253	1	0.0366118
SIK2	0.00347925	0.393253	1	0.0366118
FOS	0.00348601	-0.393177	1	0.0366439
PTRF	0.00348601	0.393177	1	0.0366439
DTX3L	0.00349958	0.393025	1	0.0367279
MRPS7	0.00349958	-0.393025	1	0.0367279
SLC7A2	0.00349958	-0.393025	1	0.0367279
TAX1BP3	0.00350638	0.392948	1	0.0367798
IFI44L	0.00352465	0.390319	1	0.0369357
KRT32	0.00352603	0.390304	1	0.0369357
BST2	0.00352685	0.39272	1	0.0369357
TNF	0.00353649	0.390191	1	0.037017
MMP15	0.00354056	-0.392567	1	0.0370298
ADGRL3	0.00354146	0.390137	1	0.0370298
VPS41	0.00354743	-0.392491	1	0.0370644
JPH2	0.00354852	0.39006	1	0.0370644
CD207	0.00355914	-0.389946	1	0.0371557
CNPPD1	0.00356812	-0.392262	1	0.0372298
CNOT8	0.00358197	0.39211	1	0.0373546
COL17A1	0.00358859	0.389629	1	0.0373875
ARPC1B	0.00358891	-0.392034	1	0.0373875
PPM1J	0.00359587	-0.391957	1	0.0374402
pk	0.00360283	0.391881	1	0.037493
IL6ST	0.00360981	0.391805	1	0.0375395
COLCA2	0.003612	-0.389379	1	0.0375395
CGB5	0.00361641	0.389332	1	0.0375395
ATG5	0.0036168	0.391729	1	0.0375395
HK2	0.0036168	-0.391729	1	0.0375395
C1GALT1C1	0.00362381	0.391652	1	0.0375788
PTGFR	0.00362439	0.389247	1	0.0375788
NEDD1	0.00363082	0.391576	1	0.037606
OSBPL1A	0.00363082	-0.391576	1	0.037606
ZCCHC17	0.00364489	-0.391424	1	0.0377319
ADORA3	0.00365272	-0.388947	1	0.0377932
RAB5A	0.003659	0.391271	1	0.0378384
GOLM1	0.00366608	-0.391195	1	0.0378719
OSBPL3	0.00366608	0.391195	1	0.0378719
CRH	0.00366865	0.38878	1	0.0378787
CHRNA9	0.00367759	0.388686	1	0.0379422
TRIM67	0.00367864	-0.388675	1	0.0379422
LDLRAD3	0.00368737	-0.390966	1	0.0380125
DIRAS1	0.0036945	-0.39089	1	0.038066
TOR1B	0.00370163	0.390814	1	0.0381197
CACNG6	0.00370687	0.38838	1	0.0381535
TRAFD1	0.00370878	0.390738	1	0.0381535
PRMT7	0.00371594	-0.390661	1	0.0382017
CETP	0.00371733	0.388271	1	0.0382017
MALT1	0.00372312	0.390585	1	0.0382413
FUT8	0.0037303	0.390509	1	0.0382952
PXDN	0.00374307	0.388005	1	0.0384032
ETS2	0.00374471	0.390356	1	0.0384032
DSE	0.00375193	0.39028	1	0.0384573
LYN	0.00375916	0.390204	1	0.0385115
FHL3	0.00377367	0.390051	1	0.0386341
PADI4	0.00377504	0.387676	1	0.0386341
EPHA8	0.00379058	-0.387517	1	0.038773
NCOA7	0.00379552	0.389823	1	0.0388035
NCF2	0.00382055	0.387213	1	0.0390391
RAD51AP2	0.00382727	0.387145	1	0.0390876
CREBBP	0.00383956	0.389365	1	0.0391929
FSTL1	0.00384695	0.389289	1	0.0392277
SPRY3	0.00384695	0.389289	1	0.0392277
PIK3CG	0.00387591	0.386655	1	0.0394894
CGN	0.00387661	-0.388984	1	0.0394894
BMP5	0.00388128	0.386601	1	0.0395167
LATS1	0.00388405	0.388908	1	0.0395246
PHF21A	0.00389151	0.388832	1	0.0395597
LRRC23	0.00389151	-0.388832	1	0.0395597
EPGN	0.0038967	0.386448	1	0.0395921
SP3	0.00389899	0.388755	1	0.039595
ZNF202	0.00391397	0.388603	1	0.0397267
PRPF8	0.003929	0.388451	1	0.0398588
CFH	0.00393161	0.386101	1	0.0398648
SNAP29	0.00393654	-0.388374	1	0.0398943
UBC	0.00394409	0.388298	1	0.0399299
IGSF3	0.00394409	-0.388298	1	0.0399299
XPO6	0.00395923	0.388146	1	0.0400421
INTS9	0.00395923	-0.388146	1	0.0400421
CEBPE	0.00396221	-0.3858	1	0.0400518
NRSN2	0.00396681	-0.388069	1	0.0400778
FOXC2	0.00396948	0.385728	1	0.0400843
DIAPH3	0.00397441	0.387993	1	0.0401136
LRRK2	0.00398203	-0.387917	1	0.0401494
TMX1	0.00398203	-0.387917	1	0.0401494
MDS2	0.00400146	0.385416	1	0.0403248
SLC35F3	0.00400452	0.385387	1	0.040335
CYP2W1	0.00400822	0.385351	1	0.0403517
CDHR3	0.00401261	-0.387612	1	0.0403754
ANKRD30B	0.00402521	-0.385186	1	0.0404682
C4orf32	0.00402798	0.38746	1	0.0404682
C3orf33	0.00402798	-0.38746	1	0.0404682
IMPA2	0.00403568	-0.387383	1	0.040525
LGALS9	0.0040379	0.385063	1	0.0405267
GATA6	0.00405887	0.387155	1	0.0406958
WRAP53	0.00405887	0.387155	1	0.0406958
ANK3	0.00406674	0.384786	1	0.0407541
CST6	0.00406917	0.384762	1	0.0407577
NR2F1	0.00409779	0.386773	1	0.0409975
FAM217B	0.00409779	-0.386773	1	0.0409975
CHST5	0.00409934	0.384474	1	0.0409975
MGAT4B	0.00410561	0.386697	1	0.0410395
DDX55	0.00411345	-0.386621	1	0.041097
DOPEY1	0.00412916	0.386468	1	0.0412332
NFAM1	0.00414045	0.384084	1	0.0413251
CCDC78	0.00414492	-0.386316	1	0.0413279
FAM212A	0.00414492	-0.386316	1	0.0413279
ROBO3	0.00416867	0.386087	1	0.0415437
HADHB	0.00419253	-0.385859	1	0.0417605
TSC22D4	0.00420052	-0.385782	1	0.0418189
AIDA	0.00420851	0.385706	1	0.0418564
ZSCAN30	0.00420851	0.385706	1	0.0418564
FCHO2	0.00421652	0.38563	1	0.0418765
NOP56	0.00421652	-0.38563	1	0.0418765
GUCY2C	0.00421689	-0.383368	1	0.0418765
KIF18A	0.00422454	0.385554	1	0.0419314
CSNK1D	0.00423258	0.385477	1	0.0419901
ST8SIA6	0.0042467	-0.383092	1	0.0420865
TRIM5	0.00424869	0.385325	1	0.0420865
[truncated: 2,707 more rows]

## Sheet: Supplementary table S1B
Supplementary table S1B. Enrichment analyses based on the top 50 co-regulated genes with DDX58 mRNA expression in the Tsoi data set.
Tsoi data set (top 50 genes)
Databse:	BioPlanet 2019						WikiPathway 2021 Human							KEGG 2021 Human							GO Biological Process 2021
Index	Name	P-value	Adjusted p-value	Odds Ratio	Combined score		Index	Name	P-value	Adjusted p-value	Odds Ratio	Combined score		Index	Name	P-value	Adjusted p-value	Odds Ratio	Combined score		Index	Name	P-value	Adjusted p-value	Odds Ratio	Combined score
1	Interferon signaling	6.149e-05	0.006356	13.49	130.79		1	Fluoropyrimidine Activity WP1601	0.003078	0.183	26.77	154.84		1	JAK-STAT signaling pathway	0.007738	0.3538	7.95	38.63		1	positive regulation of interferon-beta production (GO:0032728)	9.904e-05	0.04788	38.52	355.19
2	Immune system signaling by interferons, interleukins, prolactin, and growth hormones	6.762e-05	0.006356	9.79	94.02		2	Type II interferon signaling (IFNG) WP619	0.003858	0.183	23.71	131.76		2	RIG-I-like receptor signaling pathway	0.01327	0.3538	12.18	52.65		2	response to type I interferon (GO:0034340)	0.000218	0.04788	118.71	1000.81
3	Telomerase regulation	0.0006293	0.03943	19.83	146.19		3	Novel intracellular components of RIG-I-like receptor (RLR) pathway WP3865	0.009884	0.183	14.29	65.98		3	Vitamin B6 metabolism	0.01491	0.3538	81.41	342.39		3	regulation of interferon-beta production (GO:0032648)	0.0002498	0.04788	27.62	229.1
4	RIG-I/MDA5-mediated induction of interferon-alpha/beta pathways	0.000909	0.04272	17.38	121.72		4	TCA Cycle Nutrient Utilization and Invasiveness of Ovarian Cancer WP2868	0.01244	0.183	101.77	446.44		4	Coronavirus disease	0.02024	0.3538	5.5	21.44		4	cellular response to type I interferon (GO:0071357)	0.0005758	0.06622	20.47	152.74
5	Thymic stromal lymphopoietin (TSLP) pathway	0.001482	0.05573	14.57	94.93		5	let-7 inhibition of ES cell reprogramming WP3299	0.01491	0.183	81.41	342.39		5	NF-kappa B signaling pathway	0.0279	0.3538	8.11	29.02		5	type I interferon signaling pathway (GO:0060337)	0.0005758	0.06622	20.47	152.74
6	Interferon-gamma signaling pathway	0.001838	0.05758	13.48	84.93		6	Nicotine Metabolism WP1600	0.01491	0.183	81.41	342.39		6	Drug metabolism	0.02991	0.3538	7.8	27.38		6	positive regulation of type I interferon production (GO:0032481)	0.0009442	0.09048	17.14	119.41
7	TRAF6-mediated IRF7 activation	0.002548	0.06429	29.65	177.06		7	Robo4 and VEGF Signaling Pathways Crosstalk WP3943	0.01491	0.183	81.41	342.39		7	Cytokine-cytokine receptor interaction	0.03743	0.3538	4.3	14.12		7	regulation of response to cytokine stimulus (GO:0060759)	0.00137	0.1032	41.52	273.73
8	Negative regulators of RIG-I/MDA5 signaling	0.003078	0.06429	26.77	154.84		8	Cytosolic DNA-sensing pathway WP4655	0.01513	0.183	11.35	47.55		8	FoxO signaling pathway	0.04252	0.3538	6.4	20.22		8	regulation of type I interferon production (GO:0032479)	0.001435	0.1032	14.74	96.51
9	Fluoropyrimidine activity	0.003078	0.06429	26.77	154.84		9	Regulatory circuits of the STAT3 signaling pathway WP4538	0.0163	0.183	10.9	44.85		9	Human papillomavirus infection	0.04977	0.3538	3.82	11.46		9	cellular response to cadmium ion (GO:0071276)	0.002066	0.132	33.21	205.3
10	Type II interferon signaling (interferon-gamma)	0.00695	0.1287	17.28	85.84		10	Molybdenum cofactor (Moco) biosynthesis WP4507	0.01737	0.183	67.84	274.94		10	Pantothenate and CoA biosynthesis	0.05123	0.3538	20.34	60.43		10	response to cadmium ion (GO:0046686)	0.002382	0.1322	30.75	185.7
